# Supplementary material for: Nonlinear properties of benzothiadiazole-based intramolecular charge-transfer compounds
Source: Royal Society of Chemistry journal article supplement (doi:10.1039/d2nj06157k), 2023-01-01
Supplement: d2nj06157k1.pdf [file d2nj06157k1.pdf]

## Supporting Information

### Nonlinear Properties of Intramolecular Charge-Transfer Compounds Based on Benzothiadiazole

Xiang-Zhao Zhu,<sup>a</sup> Hong-Dan Hu,<sup>a</sup> Song-Hua Chen,<sup>\*b</sup> Yuan-Ming Li,<sup>\*a</sup> and Jian-Feng  
Yan<sup>\*a</sup> and Yao-Feng Yuan<sup>\*a</sup>

<sup>a</sup>Laboratory of Molecule Synthesis and Function Discovery (Fujian Province  
University), Department of Chemistry, Fuzhou University, Fuzhou 350108, China;

<sup>b</sup>College of Chemistry and Material Science, Longyan University, Longyan  
364012, China;

Corresponding to e-mail: [yaofeng\\_yuan@fzu.edu.cn](mailto:yaofeng_yuan@fzu.edu.cn),  
[yuanming.li@xmu.edu.cn](mailto:yuanming.li@xmu.edu.cn), [yanjianfeng@fzu.edu.cn](mailto:yanjianfeng@fzu.edu.cn), [songhua@iccas.ac.cn](mailto:songhua@iccas.ac.cn)

---

## Table of Content

|                                                                                             |    |
|---------------------------------------------------------------------------------------------|----|
| 1. Experimental section .....                                                               | 3  |
| 1.1 Materials and reagents .....                                                            | 3  |
| 1.2 Syntheses and Characterizations .....                                                   | 3  |
| 2. Optical Properties .....                                                                 | 4  |
| 2.1 UV-vis absorption measurements .....                                                    | 4  |
| 2.2 Fluorescence emission spectra .....                                                     | 6  |
| 3. Nonlinear data supplement .....                                                          | 7  |
| 4. Electrochemistry .....                                                                   | 9  |
| 5. Computational Methodology and Calculation data: .....                                    | 9  |
| 5.1 Theoretical calculation data summarized in tables .....                                 | 10 |
| 5.2 Optimized geometries and calculated energies, dipole moment, Mulliken charges.<br>..... | 11 |

## 1. Experimental section

### 1.1 Materials and reagents.

All commercial chemical reagents were purchased from Admas and used directly without purification. Column chromatography mainly used silica gel with 100-200 mesh and 200-300 mesh specifications for purification and separation, respectively. Dry solvents are all purchased from Tansoole Platform (Shanghai Titan Technology Co. Ltd.) and Energy Chemical. All air and moisture-sensitive reactions were carried out in an argon atmosphere. *N,N*-dimethyl-4-((4-(4,4,5,5-tetramethyl-1,3,2-dioxaborolan-2-yl)phenyl)ethynyl)aniline, (*E*)-(2-(4-(4-(dimethylamino)styryl)phenyl)-4,5,5-trimethyl-1,3,2-dioxaborolan-4-yl)methylum, (*E*)-4-(4-ethynylstyryl)-*N,N*-dimethylaniline and 4-bromo-7-nitrobenzo[*c*][1,2,5]thiadiazole were prepared according to the literature methods.<sup>1,2</sup>

### 1.2 Syntheses and Characterizations

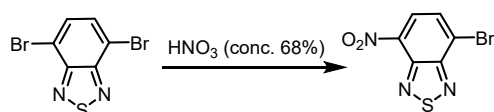

#### *N,N*-dimethyl-4-((4-(7-nitrobenzo[*c*][1,2,5]thiadiazol-4-yl)phenyl)ethynyl)aniline(BTN-1)

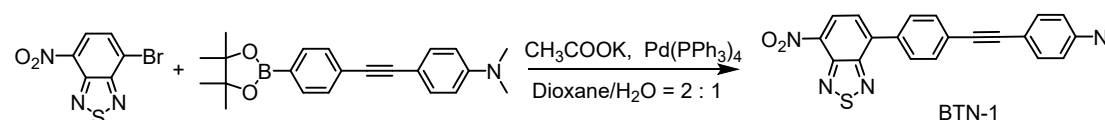

A 50 mL three-neck round-bottom flask with a magnetic stir bar was added with *N,N*-dimethyl-4-((4-(4,4,5,5-tetramethyl-1,3,2-dioxaborolan-2-yl)phenyl)ethynyl)aniline (330 mg, 0.95 mmol), 4-bromo-7-nitrobenzo[*c*][1,2,5]thiadiazole (273.6 mg, 1.05 mmol) and Pd(PPh<sub>3</sub>)<sub>4</sub> (55.6 mg, 0.048 mmol). Then Potassium acetate (306mg, 3.12mmol) in dioxane (5 mL) and distilled water (2.5 mL) were added. The mixture was stirred at 90°C overnight under N<sub>2</sub> atmosphere. The reaction mixture was cooled down to room temperature and was quenched by adding H<sub>2</sub>O. The reaction mixture was then washed with CH<sub>2</sub>Cl<sub>2</sub> and dried with anhydrous Na<sub>2</sub>SO<sub>4</sub>. The filtrate was dried under reduced pressure and subjected to silica gel flash chromatography.

**BTN-1.** Chromatography (Petroleum ether/CH<sub>2</sub>Cl<sub>2</sub>, 2:1 v/v). Yield 53%, purple-black solid. <sup>1</sup>H NMR (500 MHz, CDCl<sub>3</sub>) δ 8.77 (d, *J* = 8.0 Hz, 1H), 8.11 (dd, *J* = 9.9, 8.2 Hz, 3H), 7.71 (d, *J* = 8.4 Hz, 2H), 7.41 (d, *J* = 8.9 Hz, 2H), 6.74 (d, *J* = 9.0 Hz, 2H), 2.97 (s, 6H). <sup>13</sup>C NMR (126 MHz, CDCl<sub>3</sub>) δ 154.5, 150.4, 147.3, 141.12, 138.5, 134.4, 133, 131.7, 129.7, 128.1, 126.5, 125.7, 111.9, 109.5, 93.7, 87.5, 40.3. HRMS (ESI, *m/z*): calcd. for C<sub>22</sub>H<sub>16</sub>N<sub>4</sub>O<sub>2</sub>S [M+H]<sup>+</sup>: 401.1067; found: 401.1065.

#### (*E*)-*N,N*-dimethyl-4-(4-(7-nitrobenzo[*c*][1,2,5]thiadiazol-4-yl)styryl)aniline(BTN-2)

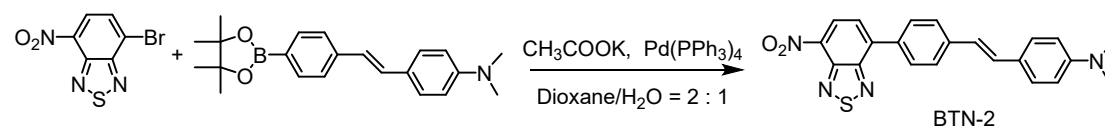

A 50 mL three-neck round-bottom flask with a magnetic stir bar was added with (*E*)-(2-(4-(4-(dimethylamino)styryl)phenyl)-4,5,5-trimethyl-1,3,2-dioxaborolan-4-yl)methylum (365 mg, 1.05 mmol), 4-bromo-7-nitrobenzo[*c*][1,2,5]thiadiazole (309.6 mg, 1.18 mmol) and Pd(PPh<sub>3</sub>)<sub>4</sub> (64.7 mg, 0.056mmol). Then Potassium acetate (302 mg, 3.08 mmol) in dioxane (5 mL) and distilled water (2.5 mL) were added. The mixture was stirred at 85°C overnight under N<sub>2</sub> atmosphere. The reaction mixture was cooled down to room temperature and was quenched by adding H<sub>2</sub>O. The reaction mixture was then washed with CH<sub>2</sub>Cl<sub>2</sub> and dried with anhydrous Na<sub>2</sub>SO<sub>4</sub>.

The filtrate was dried under reduced pressure and subjected to silica gel flash chromatography.

**BTN-2.** Chromatography (Petroleum ether/CH<sub>2</sub>Cl<sub>2</sub>, 1:1 v/v). Yield 55%, purple solid. <sup>1</sup>H NMR (500 MHz, CDCl<sub>3</sub>) δ 8.69 (d, *J* = 7.9 Hz, 1H), 7.99 (d, *J* = 8.4 Hz, 2H), 7.87 (d, *J* = 8.0 Hz, 1H), 7.67 (d, *J* = 8.4 Hz, 2H), 7.46 (d, *J* = 8.8 Hz, 2H), 7.20 (d, *J* = 16.3 Hz, 1H), 6.99 (d, *J* = 16.2 Hz, 1H), 6.73 (d, *J* = 8.8 Hz, 2H), 3.01 (s, 6H). <sup>13</sup>C NMR (126 MHz, CDCl<sub>3</sub>) δ 154.6, 150.6, 147.6, 141.8, 140.4, 138.2, 133.7, 131.0, 130.2, 128.3, 128.1, 127.7, 126.5, 125.2, 123.1, 112.4, 40.5. HRMS (ESI, *m/z*): calcd. for C<sub>22</sub>H<sub>18</sub>N<sub>4</sub>O<sub>2</sub>S [M+H]<sup>+</sup>: 403.1215, found: 403.1223.

**(*E*)-*N,N*-dimethyl-4-(4-((7-nitrobenzo[*c*][1,2,5]thiadiazol-4-yl)ethynyl)styryl)aniline(BTN-3)**

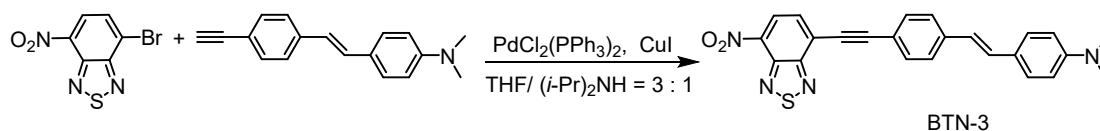

A 50 mL three-neck round-bottom flask with a magnetic stir bar was added with (*E*)-4-(4-ethynylstyryl)-*N,N*-dimethylaniline (251.2 mg, 1.02 mmol), and 4-bromo-7-nitrobenzo[*c*][1,2,5]thiadiazole (301.2mg, 1.16mmol), PdCl<sub>2</sub>(PPh<sub>3</sub>)<sub>2</sub> (38 mg, 0.033mmol) and CuI (32 mg, 0.168mmol). Then THF/ (*i*-Pr)<sub>2</sub>NH (30 mL / 10 mL) was added. The mixture was stirred at room temperature for 6 h under Ar atmosphere. The mixture was dried under reduced pressure and subjected to silica gel flash chromatography.

**BTN-3.** Chromatography (Petroleum ether/CH<sub>2</sub>Cl<sub>2</sub>, 2:1 v/v). Yield 51%, purple-black solid. <sup>1</sup>H NMR (500 MHz, CDCl<sub>3</sub>) δ 8.61 (d, *J* = 7.9 Hz, 1H), 7.89 (d, *J* = 7.9 Hz, 1H), 7.66 (d, *J* = 8.3 Hz, 2H), 7.53 (d, *J* = 8.2 Hz, 2H), 7.44 (d, *J* = 8.7 Hz, 2H), 7.15 (d, *J* = 16.2 Hz, 1H), 6.92 (d, *J* = 16.2 Hz, 1H), 6.72 (d, *J* = 8.9 Hz, 2H), 3.01 (s, 6H). 7.44 (d, *J* = 8.7 Hz, 2H), 7.15 (d, *J* = 16.2 Hz, 1H), 6.92 (d, *J* = 16.2 Hz, 1H), 6.72 (d, *J* = 8.9 Hz, 2H), 3.01 (s, 6H). <sup>13</sup>C NMR (126 MHz, CDCl<sub>3</sub>) δ 159.7, 153.9, 150.7, 142, 140.4, 137.5, 133.7, 131.0, 130.2, 129.9, 128.1, 127.7, 126.5, 125.2, 123.1, 112.4, 93.3, 40.5. HRMS (ESI, *m/z*): calcd. for C<sub>24</sub>H<sub>18</sub>N<sub>4</sub>O<sub>2</sub>S [M+H]<sup>+</sup>: 427.1223; found: 427.1217.

## References

1. J. Kulhánek, F. Bureš and M. J. B. j. o. o. c. *Ludwig*, 2009, 5, 11.
2. C.-F. Yang, L.-Y. Zeng, B.-K. Ning, J.-Y. Wang, H. Zhang, Z.-H. J. S. A. P. A. M. Zhang and B. *Spectroscopy*, 2020, 225, 117482.

## 2. Optical Properties

### 2.1 UV-vis absorption measurements

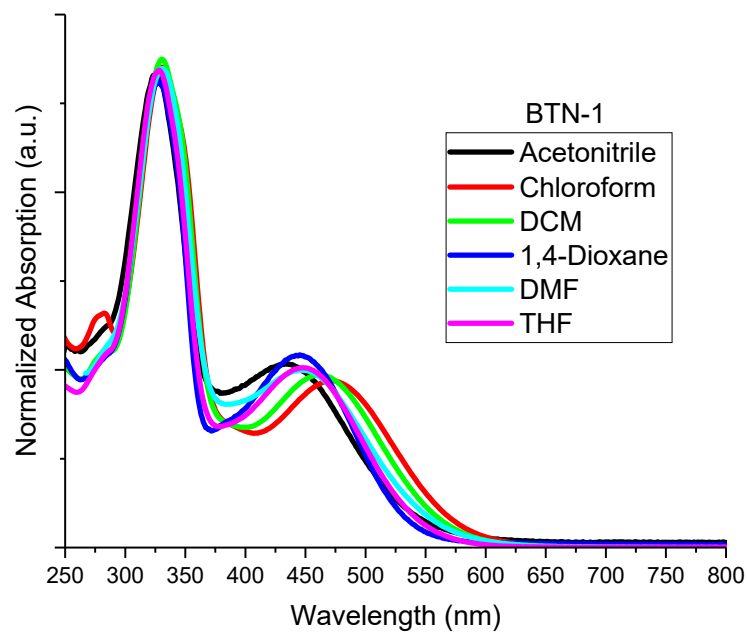

Fig. S1 Optical absorption spectra of the chromophores BTN-1 in solvents of varying polarity

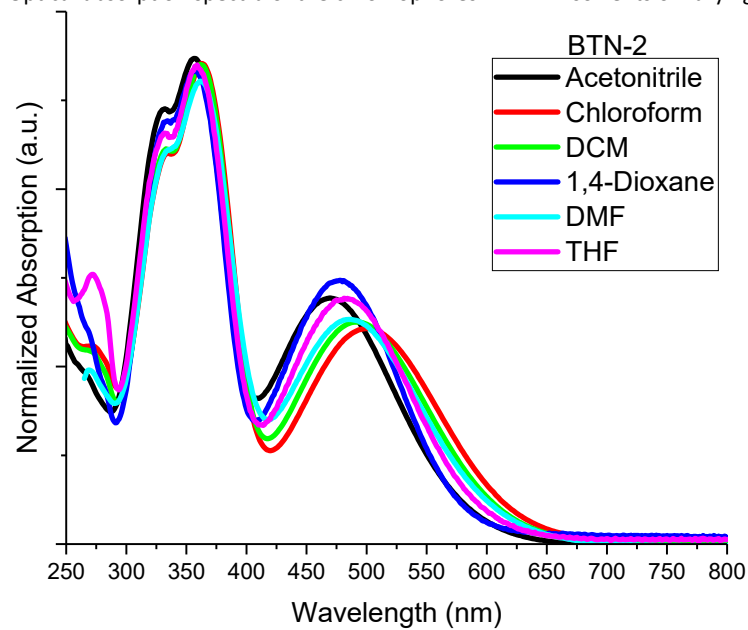

Fig. S2 Optical absorption spectra of the chromophores BTN-2 in solvents of varying polarity

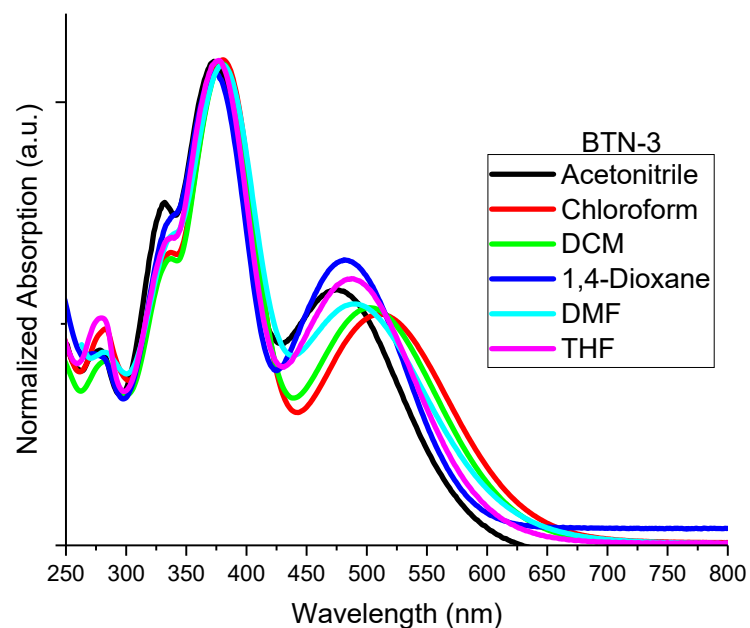

Fig. S3 Optical absorption spectra of the chromophores BTN-3 in solvents of varying polarity.

The particular behavior observed from BTN-1, BTN-2 and BTN-3 is the change in spectral shape in different solvents (Fig. S1-3), which shows some subtle effects. From Fig. S1-3, the largest red-shift is chloroform followed by dichlorine, and the largest blue shift is 1,4-Dioxane followed by THF and DMF. This is one of the reasons why chloroform was chosen as the solvation model in the theoretical calculations.

## 2.2 Fluorescence emission spectra

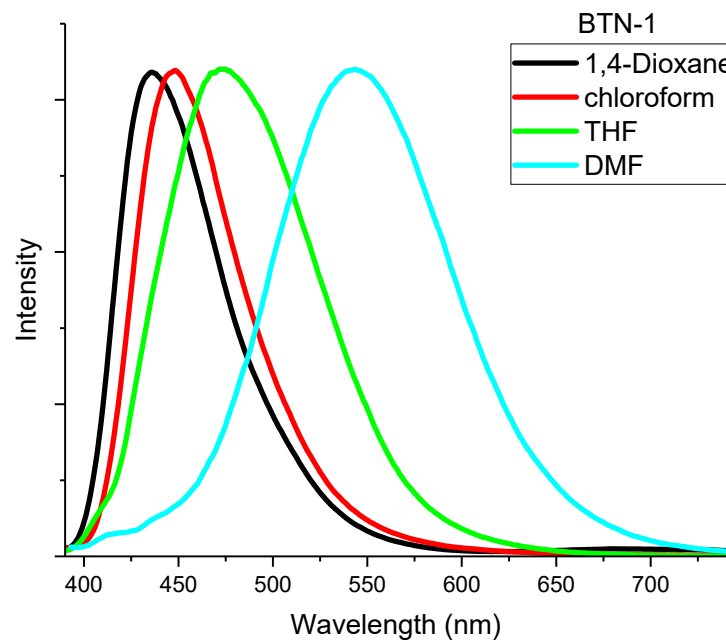

Fig. S4 Fluorescence emission spectra of the chromophores BTN-1 in solvents of varying polarity.

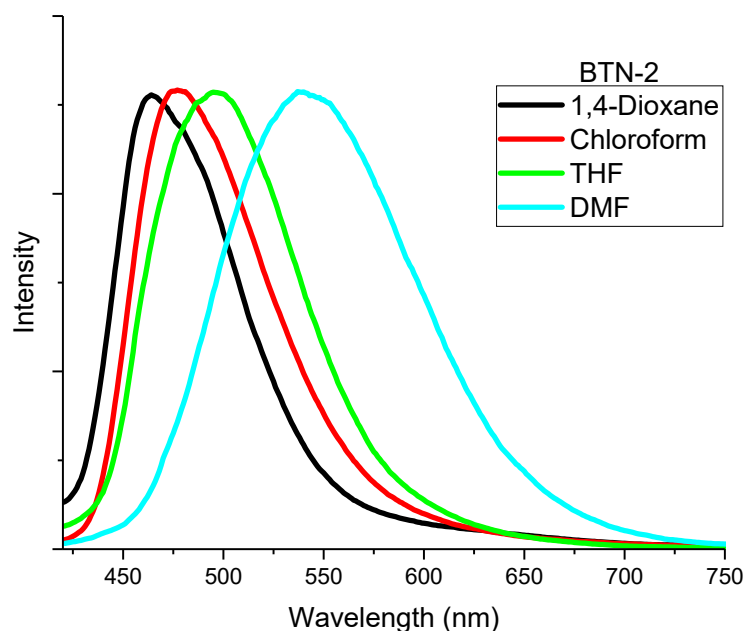

Fig. S5 Fluorescence emission spectra of the chromophores BTN-2 in solvents of varying polarity.

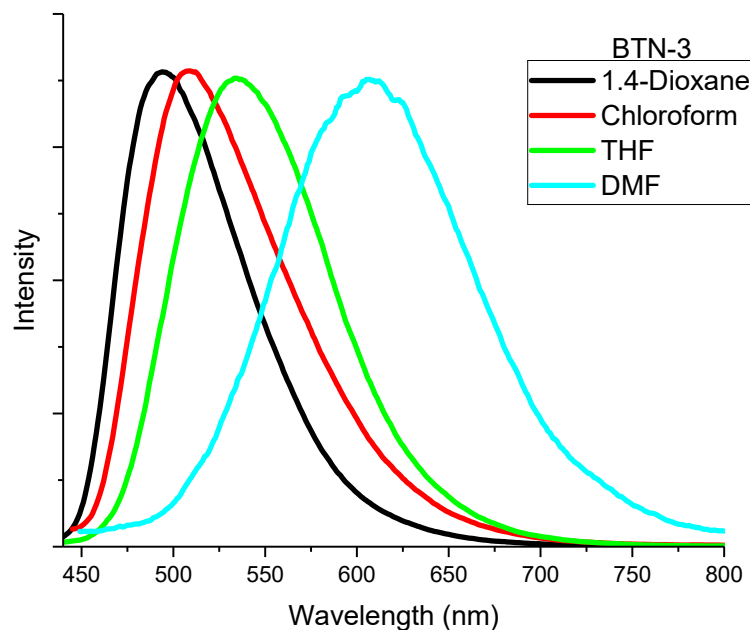

Fig. S6 Fluorescence emission spectra of the chromophores BTN-3 in solvents of varying polarity.

The fluorescence spectra of BTN-1, BTN-2 and BTN-3 were measured in a different diluted solution. As shown in Fig. S4-6. However, the fluorescent emission spectrum of BTN-1, BTN-2 and BTN-3 show significant red-shifts from low polarity to high polarity solvents (Fig. S4-6). The strong solvent polarity-dependent fluorescence indicates that BTN-1, BTN-2 and BTN-1 have a highly charged excited state due to photoinduced charge transfer.

### 3. Nonlinear data supplement

(Because the BTN-2 liner transmission index is too low, the nonlinear signal response is too weak to fit.)

To understand the nonlinear properties of the chromophores in the solution, there is an assumption of a particle non-interaction solution. Thus, the effective refractive nonlinearity in the pair-wise additive model can be expressed as:

$$n_{2, solution} = (1 - f) n_{2, solvent} + f n_{2, solute} \quad \#(1)$$

where  $f$  is the molar fraction (the ratio of the amount of solute substance to the amount of solution substance) contained in the dilute solution,  $n_{2, solvent}$  and  $n_{2, solute}$  are the nonlinear refractive indices of the solvent and solute, respectively. Molar mass  $M_{DMF} = 73.09$  g/mol, density  $\rho_{DMF} = 0.944$  g/ml,  $d_0 = 1 \times 10^{-5}$  mol/ml,  $f = d_0 / (d_0 + \rho_{DMF} / M_{DMF}) = 0.077\%$ .

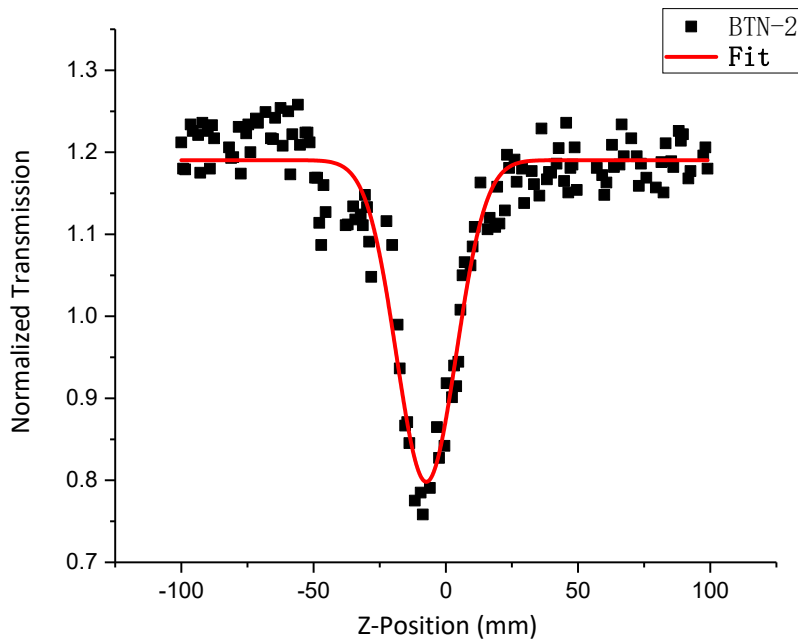

Fig. S7 Normalized closed-aperture Z-Scan curve of BTN-2.

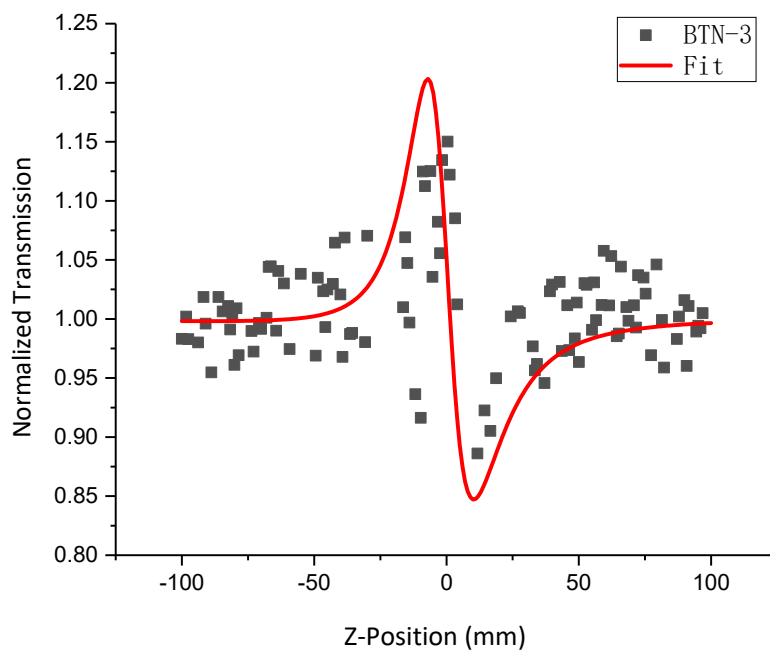

Fig. S8 Normalized closed-aperture Z-Scan curve of BTN-3.



#### 4. Electrochemistry

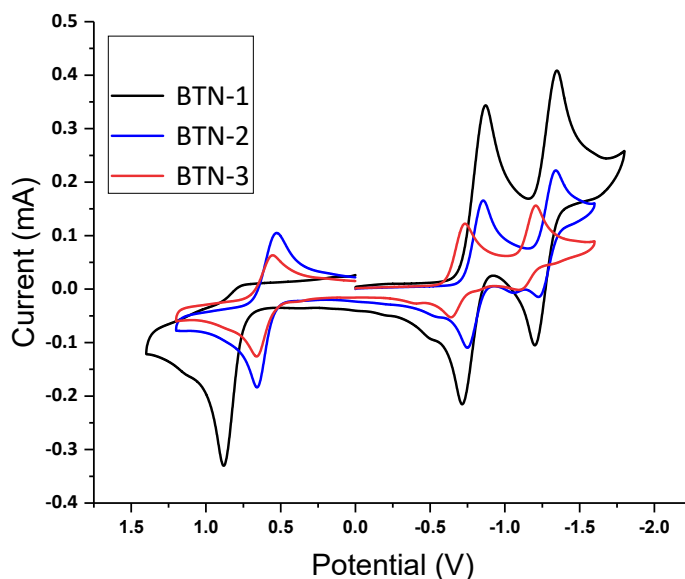

Fig. S9 Electrochemical spectra of BTN-1, BTN-2 and BTN-3.

Table S1 Electrochemical properties of BTN-3, BTN-4 and BTN-5.

| Compound | $E_{\text{ox}}^{\text{onset},a}$ | $E_{\text{red}}^{\text{onset},a}$ | HOMO/LUMO (eV) <sup>b</sup> | HOMO/LUMO (eV) <sup>d</sup> | $\Delta E_g$ (eV) <sup>c</sup> | $\Delta E_g$ (eV) <sup>d</sup> |
|----------|----------------------------------|-----------------------------------|-----------------------------|-----------------------------|--------------------------------|--------------------------------|
| BTN-1    | 0.78                             | -1.27                             | -2.73 / -5.18               | -3.33 / -5.53               | 2.45                           | 2.20                           |
| BTN-2    | 0.60                             | -1.26                             | -2.74 / -5.00               | -3.28 / -5.38               | 2.26                           | 2.10                           |
| BTN-3    | 0.59                             | -1.15                             | -3.25 / -4.99               | -3.09 / -5.31               | 1.74                           | 1.96                           |

<sup>a</sup> Measured in  $\text{CH}_2\text{Cl}_2$  solution (glass carbon electrode with 0.1 M n-Bu<sub>4</sub>NF<sub>6</sub> as the supporting electrolyte). The voltages are referenced to a SCE electrode.

<sup>b</sup> Calculated based on the respective onset oxidation and reduction potentials.

<sup>c</sup> HOMO and LUMO gap calculated based on the redox potentials:  $E_g = -e(E_{\text{red}}^{\text{onset}} - E_{\text{ox}}^{\text{onset}})$  eV.

<sup>d</sup> Calculated based on PBE1PBE/6-31G\*.

From the energy levels calculated theoretically and projected electrochemically, the  $\Delta E_g$  of the three chromophores are BTN-1 > BTN-2 > BTN-3 from small to large, which is consistent with the mechanism that the energy gap decreases with the growth of conjugation.

#### 5. Computational Methodology and Calculation data

Unfortunately, due to the very low solubility of the three compounds, we only obtained crystals of BTN-1 and BTN-3, and the crystal data obtained was not usable because the points of the crystals were too weak. Therefore, all structural optimization calculations are performed by Gaussian 16W.

##### 5.1 Theoretical calculation data summarized in tables

Table S2. The computed dipole moment of chromophores under vacuum and chloroform conditions

| Chromophor | vacuum      |             |                 | polar medium ( $\text{CHCl}_3$ ) |             |                 |
|------------|-------------|-------------|-----------------|----------------------------------|-------------|-----------------|
|            | $\mu_g$ (D) | $\mu_e$ (D) | $\Delta\mu$ (D) | $\mu_g$ (D)                      | $\mu_e$ (D) | $\Delta\mu$ (D) |
| BTN-1      | 11.54       | 51.74       | 40.20           | 13.38                            | 40.82       | 27.44           |

|       |       |       |       |       |       |       |
|-------|-------|-------|-------|-------|-------|-------|
| BTN-2 | 11.63 | 48.66 | 37.03 | 14.10 | 38.29 | 24.19 |
| BTN-3 | 13.78 | 56.07 | 42.29 | 16.29 | 43.94 | 27.65 |

Table S3. Optical Absorption Properties ( $\lambda_{Max}$ ,  $M_{ge}$  and  $E_{ge}$ ) of the Intramolecular Charge Transfer.

|       | $\lambda_{Max}$ (nm) <sup>a</sup> |     |                   | $\mu_{ge}$ (D) <sup>b</sup> |                   |      | $E_{ge}$ (eV) <sup>b</sup> |      |                   | $M_{ge}$ (D) <sup>c</sup> |      |      |
|-------|-----------------------------------|-----|-------------------|-----------------------------|-------------------|------|----------------------------|------|-------------------|---------------------------|------|------|
|       | 1.4-Dio                           |     | DM                | 1.4-Dio                     |                   | DMF  | 1.4-Diox                   |      | DM                | 1.4-Dio                   |      | DMF  |
|       | CHCl <sub>3</sub>                 | F   | CHCl <sub>3</sub> | DMF                         | CHCl <sub>3</sub> | F    | CHCl <sub>3</sub>          | F    | CHCl <sub>3</sub> | DMF                       | DMF  |      |
| BTN-1 | 448                               | 472 | 446               | 9.16                        | 9.23              | 9.25 | 1.89                       | 1.86 | 1.85              | 7.38                      | 6.43 | 7.30 |
| BTN-2 | 480                               | 501 | 487               | 10.02                       | 0                 | 3    | 1.80                       | 1.75 | 1.73              | 9.95                      | 9.38 | 0    |
| BTN-3 | 481                               | 511 | 489               | 11.92                       | 2                 | 7    | 1.72                       | 1.67 | 1.63              | 9.96                      | 9.51 | 9.85 |

<sup>a</sup> Assigned to ICT excitation, and from UV-vis absorption in THF.

<sup>b</sup> Calculated by PBE1PBE/aug-cc-pVTZ

$$M_{ge}^2 = \frac{1500(hc)^2 \ln 10}{\pi N_A E_{ge}} \int \epsilon_{ge}(\nu) d\nu$$

<sup>c</sup> Calculated from

Comparing the theoretical calculations and the estimated transition dipole moment based on the UV-Vis ICT peak area, the size of the dipole moment is basically at a moderate level, so it is known that the impact of the transition dipole moment on the nonlinear response is not significant.

Table S4. Experimentally measured and theoretically calculated optical properties and frontier molecular orbita

|       | $\lambda_{abs}$ (nm) <sup>a</sup> | $\lambda_{max}$ (nm) <sup>b</sup> | $\Delta\lambda_{st}$ (nm) | $\Delta\lambda_{max}$ (nm) <sup>c</sup> | $\lambda_{max}$ (nm) <sup>d</sup> | Oscillation strength, $f^d$ | Energy (eV) <sup>d</sup> | Selected major contributions <sup>d</sup>             |
|-------|-----------------------------------|-----------------------------------|---------------------------|-----------------------------------------|-----------------------------------|-----------------------------|--------------------------|-------------------------------------------------------|
| BTN-1 | 327/457                           | 472                               | 15                        | 16.8                                    | 665.79                            | 0.52                        | 1.86                     | H -> L, 99.1 %                                        |
|       |                                   |                                   |                           |                                         | 412.20                            | 0.41                        | 3.01                     | H-1 -> L, 93.6 %                                      |
|       |                                   |                                   |                           |                                         | 388.52                            | 0.24                        | 3.19                     | H -> L+1, 95.2 %                                      |
|       |                                   |                                   |                           |                                         | 353.74                            | 0.79                        | 3.51                     | H -> L+2, 91.6 %                                      |
| BTN-2 | 334/360/482                       | 497                               | 15.2                      | 25.2                                    | 706.50                            | 0.58                        | 1.75                     | H -> L, 99.2 %                                        |
|       |                                   |                                   |                           |                                         | 424.97                            | 0.42                        | 2.92                     | H-1 -> L, 90.7 %,<br>H -> L, 5.7 %                    |
|       |                                   |                                   |                           |                                         | 405.96                            | 0.33                        | 3.05                     | H -> L+1, 92.8 %,<br>H -> L+2, 5.8 %                  |
|       |                                   |                                   |                           |                                         | 376.60                            | 0.57                        | 3.29                     | H -> L+2 86.5 %,<br>H-1 -> L 6.8 %,<br>H -> L+1 5.3 % |
| BTN-3 | 338/380/503                       | 533                               | 30.6                      | 39.2                                    | 744.38                            | 0.81                        | 1.67                     | H -> L, 99.4 %                                        |
|       |                                   |                                   |                           |                                         | 462.75                            | 0.75                        | 2.68                     | H-1 -> L, 90.8 %,<br>H -> L+2, 6.2 %                  |
|       |                                   |                                   |                           |                                         | 412.74                            | 0.64                        | 3.00                     | H -> L+1, 75.5 %,<br>H -> L+2, 19.5 %                 |
|       |                                   |                                   |                           |                                         | 388.77                            | 0.16                        | 3.18                     | H -> L+2 72.4%, H -> L+1 22.4%                        |

---

<sup>a</sup> Experimentally measured UV absorption peaks

<sup>b</sup> Experimentally measured fluorescence emission peaks

<sup>c</sup> Calculated by PBE1PBE/aug-cc-pVTZ in solvents of varying polarity.

<sup>d</sup> Calculated by PBE1PBE/aug-cc-pVTZ under an applied electric field of single-linear state.

---

## 5.2 Optimized geometries and calculated energies,dipole moment, Mulliken charges.

### BTN-1 Theoretical calculation data supplement:

Table 1. BTN-1 Optimization of ground state geometry in vacuum

Standard orientation:

| Center<br>Number | Atomic<br>Number | Atomic<br>Type | Coordinates (Angstroms) |           |           |
|------------------|------------------|----------------|-------------------------|-----------|-----------|
|                  |                  |                | X                       | Y         | Z         |
| 1                | 6                | 0              | 5.372482                | -1.873795 | -0.324138 |
| 2                | 6                | 0              | 6.219177                | -0.805277 | -0.149716 |
| 3                | 6                | 0              | 5.660878                | 0.490356  | 0.078628  |
| 4                | 6                | 0              | 4.205283                | 0.618767  | 0.108488  |
| 5                | 6                | 0              | 3.336444                | -0.514046 | -0.084761 |
| 6                | 6                | 0              | 3.967483                | -1.729822 | -0.295964 |
| 7                | 7                | 0              | 6.301674                | 1.642168  | 0.295644  |
| 8                | 16               | 0              | 5.145413                | 2.785423  | 0.522174  |
| 9                | 7                | 0              | 3.796410                | 1.867930  | 0.355731  |
| 10               | 6                | 0              | -5.786720               | -1.184284 | 0.452195  |
| 11               | 6                | 0              | -7.170001               | -1.132218 | 0.444031  |
| 12               | 6                | 0              | -7.855502               | -0.000471 | -0.062838 |
| 13               | 6                | 0              | -7.073262               | 1.085010  | -0.524827 |
| 14               | 6                | 0              | -5.690475               | 1.022478  | -0.512036 |
| 15               | 7                | 0              | -9.231528               | 0.036643  | -0.108067 |
| 16               | 6                | 0              | -9.907123               | 1.293910  | -0.434307 |
| 17               | 6                | 0              | -10.007515              | -1.006531 | 0.564358  |
| 18               | 6                | 0              | -3.593889               | -0.172010 | -0.021961 |
| 19               | 6                | 0              | -5.009049               | -0.113766 | -0.027259 |
| 20               | 6                | 0              | 1.870525                | -0.406773 | -0.046285 |
| 21               | 6                | 0              | 1.098848                | -1.479214 | 0.443044  |
| 22               | 6                | 0              | -0.285106               | -1.423721 | 0.455427  |
| 23               | 6                | 0              | -0.962172               | -0.281142 | -0.032612 |
| 24               | 6                | 0              | -0.191829               | 0.789747  | -0.520863 |
| 25               | 6                | 0              | 1.193132                | 0.732816  | -0.520958 |
| 26               | 6                | 0              | -2.377104               | -0.219800 | -0.026588 |
| 27               | 7                | 0              | 7.659470                | -1.041000 | -0.213277 |
| 28               | 8                | 0              | 8.407049                | -0.070898 | -0.128900 |
| 29               | 8                | 0              | 8.036607                | -2.209383 | -0.352022 |
| 30               | 1                | 0              | 5.814648                | -2.846309 | -0.501494 |
| 31               | 1                | 0              | 3.364156                | -2.611381 | -0.480924 |
| 32               | 1                | 0              | -5.285954               | -2.066306 | 0.842440  |
| 33               | 1                | 0              | -7.723787               | -1.980457 | 0.831466  |
| 34               | 1                | 0              | -7.550931               | 1.979672  | -0.899083 |
| 35               | 1                | 0              | -5.114361               | 1.865975  | -0.875702 |
| 36               | 1                | 0              | -9.678469               | 2.112045  | 0.286700  |
| 37               | 1                | 0              | -9.617729               | 1.649735  | -1.451791 |
| 38               | 1                | 0              | -10.985324              | 1.114445  | -0.437161 |
| 39               | 1                | 0              | -9.775396               | -2.008582 | 0.138702  |

|    |   |   |            |           |           |
|----|---|---|------------|-----------|-----------|
| 40 | 1 | 0 | -9.818024  | -1.046513 | 1.664244  |
| 41 | 1 | 0 | -11.069309 | -0.809879 | 0.396168  |
| 42 | 1 | 0 | 1.596054   | -2.353105 | 0.852340  |
| 43 | 1 | 0 | -0.862532  | -2.247782 | 0.850859  |
| 44 | 1 | 0 | -0.699464  | 1.669724  | -0.901798 |
| 45 | 1 | 0 | 1.761342   | 1.572729  | -0.898936 |

Standard basis: 6-31G(d) (6D, 7F)

SCF Done: E(RB3LYP) = -1615.55248267 a.u.

Thermal correction to Gibbs Free Energy = 0.278524 a.u.

**Table 2 BTN-1 Calculation of excited state geometry in vacuum and dipole moments**

| Standard orientation |        |        |                         |           |           |
|----------------------|--------|--------|-------------------------|-----------|-----------|
| Center               | Atomic | Atomic | Coordinates (Angstroms) |           |           |
| Number               | Number | Type   | X                       | Y         | Z         |
| 1                    | 6      | 0      | 5.361551                | -1.867296 | -0.336899 |
| 2                    | 6      | 0      | 6.208173                | -0.804556 | -0.155957 |
| 3                    | 6      | 0      | 5.651638                | 0.486753  | 0.079402  |
| 4                    | 6      | 0      | 4.204441                | 0.617339  | 0.109198  |
| 5                    | 6      | 0      | 3.333047                | -0.508030 | -0.087864 |
| 6                    | 6      | 0      | 3.959068                | -1.721039 | -0.306842 |
| 7                    | 7      | 0      | 6.290699                | 1.634580  | 0.302310  |
| 8                    | 16     | 0      | 5.143989                | 2.760904  | 0.529496  |
| 9                    | 7      | 0      | 3.802530                | 1.864608  | 0.360785  |
| 10                   | 6      | 0      | -5.778473               | -1.166597 | 0.480595  |
| 11                   | 6      | 0      | -7.159329               | -1.111093 | 0.488505  |
| 12                   | 6      | 0      | -7.845785               | 0.022925  | -0.000590 |
| 13                   | 6      | 0      | -7.066231               | 1.090475  | -0.499637 |
| 14                   | 6      | 0      | -5.685860               | 1.024326  | -0.502704 |
| 15                   | 7      | 0      | -9.216057               | 0.085276  | 0.009245  |
| 16                   | 6      | 0      | -9.889126               | 1.242629  | -0.528651 |
| 17                   | 6      | 0      | -9.985376               | -1.034801 | 0.494337  |
| 18                   | 6      | 0      | -3.589187               | -0.165132 | -0.019656 |
| 19                   | 6      | 0      | -5.003970               | -0.103028 | -0.013480 |
| 20                   | 6      | 0      | 1.868770                | -0.398750 | -0.051139 |
| 21                   | 6      | 0      | 1.100308                | -1.463403 | 0.449202  |
| 22                   | 6      | 0      | -0.281561               | -1.407843 | 0.463805  |
| 23                   | 6      | 0      | -0.957583               | -0.278343 | -0.032997 |
| 24                   | 6      | 0      | -0.190509               | 0.790201  | -0.531366 |
| 25                   | 6      | 0      | 1.192356                | 0.733602  | -0.533370 |
| 26                   | 6      | 0      | -2.372497               | -0.217301 | -0.025430 |
| 27                   | 7      | 0      | 7.642514                | -1.042563 | -0.220627 |
| 28                   | 8      | 0      | 8.383474                | -0.081032 | -0.127383 |
| 29                   | 8      | 0      | 8.011172                | -2.201159 | -0.368461 |
| 30                   | 1      | 0      | 5.803923                | -2.840016 | -0.520688 |
| 31                   | 1      | 0      | 3.352754                | -2.600769 | -0.497175 |

|    |   |   |            |           |           |
|----|---|---|------------|-----------|-----------|
| 32 | 1 | 0 | -5.277418  | -2.050951 | 0.863301  |
| 33 | 1 | 0 | -7.711546  | -1.958389 | 0.878647  |
| 34 | 1 | 0 | -7.544870  | 1.981486  | -0.889551 |
| 35 | 1 | 0 | -5.112006  | 1.860243  | -0.891942 |
| 36 | 1 | 0 | -9.613467  | 2.159767  | 0.009917  |
| 37 | 1 | 0 | -9.663335  | 1.392696  | -1.594238 |
| 38 | 1 | 0 | -10.967492 | 1.109496  | -0.429436 |
| 39 | 1 | 0 | -9.805185  | -1.945154 | -0.095408 |
| 40 | 1 | 0 | -9.757155  | -1.259610 | 1.545314  |
| 41 | 1 | 0 | -11.048036 | -0.796513 | 0.427883  |
| 42 | 1 | 0 | 1.598212   | -2.334157 | 0.866992  |
| 43 | 1 | 0 | -0.857563  | -2.233900 | 0.868976  |
| 44 | 1 | 0 | -0.698304  | 1.667498  | -0.919739 |
| 45 | 1 | 0 | 1.759502   | 1.571819  | -0.920804 |

Ground to excited state transition electric dipole moments (Au):

| state | X       | Y       | Z       | Dip. S. | Osc.   |
|-------|---------|---------|---------|---------|--------|
| 1     | 2.9401  | -0.0265 | -0.0069 | 8.6447  | 0.4270 |
| 2     | -2.0110 | 0.0662  | 0.0236  | 4.0489  | 0.3105 |
| 3     | -2.2529 | 0.1508  | 0.0220  | 5.0989  | 0.4219 |
| 4     | -0.0231 | 0.0133  | -0.0058 | 0.0007  | 0.0001 |
| 5     | 2.5027  | -0.0194 | 0.0378  | 6.2654  | 0.5685 |
| 6     | -0.7885 | -0.1013 | 0.0696  | 0.6368  | 0.0579 |
| 7     | -0.1698 | 0.2423  | 0.0649  | 0.0918  | 0.0088 |
| 8     | -0.0025 | 0.0075  | 0.0002  | 0.0001  | 0.0000 |
| 9     | 0.0140  | 0.0071  | 0.0015  | 0.0002  | 0.0000 |
| 10    | 0.0266  | -0.0216 | 0.0495  | 0.0036  | 0.0004 |
| 11    | 0.0957  | -1.0163 | -0.2082 | 1.0854  | 0.1122 |
| 12    | -0.0472 | 0.4677  | -0.2570 | 0.2870  | 0.0305 |
| 13    | 0.0214  | 0.2575  | -0.0137 | 0.0669  | 0.0071 |
| 14    | 0.4348  | -0.1074 | 0.0320  | 0.2016  | 0.0217 |
| 15    | 0.9784  | -0.1344 | -0.0318 | 0.9764  | 0.1065 |
| 16    | -0.8431 | -0.2221 | -0.0396 | 0.7617  | 0.0884 |
| 17    | 0.3071  | 0.2175  | 0.0382  | 0.1431  | 0.0168 |
| 18    | -0.4168 | 0.1812  | 0.0357  | 0.2078  | 0.0247 |
| 19    | -0.0833 | 0.3492  | 0.0529  | 0.1317  | 0.0159 |
| 20    | -0.0582 | 0.0244  | 0.0136  | 0.0042  | 0.0005 |
| 21    | -0.0363 | -0.0059 | -0.0029 | 0.0014  | 0.0002 |
| 22    | -0.5172 | 0.1053  | 0.0129  | 0.2787  | 0.0346 |
| 23    | 0.0280  | -0.3187 | 0.0910  | 0.1107  | 0.0140 |
| 24    | 0.0037  | -0.0592 | 0.0553  | 0.0066  | 0.0008 |
| 25    | 0.2144  | -0.0758 | -0.0503 | 0.0543  | 0.0069 |
| 26    | 0.0234  | 0.0085  | -0.0172 | 0.0009  | 0.0001 |
| 27    | -0.0139 | -0.3598 | 0.1632  | 0.1563  | 0.0206 |
| 28    | 0.0676  | -0.0053 | 0.0231  | 0.0051  | 0.0007 |
| 29    | -0.1434 | -0.5829 | -0.1188 | 0.3745  | 0.0499 |
| 30    | -0.0003 | 0.1662  | 0.3812  | 0.1730  | 0.0235 |
| 31    | 0.2054  | 0.1819  | 0.0435  | 0.0772  | 0.0105 |
| 32    | -0.0137 | 0.0618  | 0.0333  | 0.0051  | 0.0007 |
| 33    | 0.0196  | 0.3826  | -0.1682 | 0.1751  | 0.0240 |
| 34    | -0.0316 | 0.0208  | -0.0591 | 0.0049  | 0.0007 |
| 35    | 0.1049  | -0.0047 | -0.0149 | 0.0113  | 0.0016 |

|    |         |         |         |        |        |
|----|---------|---------|---------|--------|--------|
| 36 | 0.0230  | 0.0111  | 0.0165  | 0.0009 | 0.0001 |
| 37 | 0.3216  | 0.0644  | 0.0695  | 0.1124 | 0.0157 |
| 38 | -0.0625 | -0.1837 | -0.2909 | 0.1223 | 0.0173 |
| 39 | 0.2004  | -0.0261 | -0.1454 | 0.0620 | 0.0088 |
| 40 | 0.0595  | -0.1394 | -0.0408 | 0.0246 | 0.0035 |

Standard basis:TZVP (5D, 7F)

SCF Done: E(RPBE1PBE) = -1614.29472680 a.u.

**Table 3. BTN-1 Optimization of Ground State Geometry in Chloroform Solvent and Mulliken charges**

| Standard orientation: |        |        |                         |           |           |
|-----------------------|--------|--------|-------------------------|-----------|-----------|
| Center                | Atomic | Atomic | Coordinates (Angstroms) |           |           |
| Number                | Number | Type   | X                       | Y         | Z         |
| 1                     | 6      | 0      | 5.372482                | -1.873795 | -0.324138 |
| 2                     | 6      | 0      | 6.219177                | -0.805277 | -0.149716 |
| 3                     | 6      | 0      | 5.660878                | 0.490356  | 0.078628  |
| 4                     | 6      | 0      | 4.205283                | 0.618767  | 0.108488  |
| 5                     | 6      | 0      | 3.336444                | -0.514046 | -0.084761 |
| 6                     | 6      | 0      | 3.967483                | -1.729822 | -0.295964 |
| 7                     | 7      | 0      | 6.301674                | 1.642168  | 0.295644  |
| 8                     | 16     | 0      | 5.145413                | 2.785423  | 0.522174  |
| 9                     | 7      | 0      | 3.796410                | 1.867930  | 0.355731  |
| 10                    | 6      | 0      | -5.786720               | -1.184284 | 0.452195  |
| 11                    | 6      | 0      | -7.170001               | -1.132218 | 0.444031  |
| 12                    | 6      | 0      | -7.855502               | -0.000471 | -0.062838 |
| 13                    | 6      | 0      | -7.073262               | 1.085010  | -0.524827 |
| 14                    | 6      | 0      | -5.690475               | 1.022478  | -0.512036 |
| 15                    | 7      | 0      | -9.231528               | 0.036643  | -0.108067 |
| 16                    | 6      | 0      | -9.907123               | 1.293910  | -0.434307 |
| 17                    | 6      | 0      | -10.007515              | -1.006531 | 0.564358  |
| 18                    | 6      | 0      | -3.593889               | -0.172010 | -0.021961 |
| 19                    | 6      | 0      | -5.009049               | -0.113766 | -0.027259 |
| 20                    | 6      | 0      | 1.870525                | -0.406773 | -0.046285 |
| 21                    | 6      | 0      | 1.098848                | -1.479214 | 0.443044  |
| 22                    | 6      | 0      | -0.285106               | -1.423721 | 0.455427  |
| 23                    | 6      | 0      | -0.962172               | -0.281142 | -0.032612 |
| 24                    | 6      | 0      | -0.191829               | 0.789747  | -0.520863 |
| 25                    | 6      | 0      | 1.193132                | 0.732816  | -0.520958 |
| 26                    | 6      | 0      | -2.377104               | -0.219800 | -0.026588 |
| 27                    | 7      | 0      | 7.659470                | -1.041000 | -0.213277 |
| 28                    | 8      | 0      | 8.407049                | -0.070898 | -0.128900 |
| 29                    | 8      | 0      | 8.036607                | -2.209383 | -0.352022 |
| 30                    | 1      | 0      | 5.814648                | -2.846309 | -0.501494 |
| 31                    | 1      | 0      | 3.364156                | -2.611381 | -0.480924 |
| 32                    | 1      | 0      | -5.285954               | -2.066306 | 0.842440  |
| 33                    | 1      | 0      | -7.723787               | -1.980457 | 0.831466  |
| 34                    | 1      | 0      | -7.550931               | 1.979672  | -0.899083 |
| 35                    | 1      | 0      | -5.114361               | 1.865975  | -0.875702 |
| 36                    | 1      | 0      | -9.678469               | 2.112045  | 0.286700  |
| 37                    | 1      | 0      | -9.617729               | 1.649735  | -1.451791 |
| 38                    | 1      | 0      | -10.985324              | 1.114445  | -0.437161 |
| 39                    | 1      | 0      | -9.775396               | -2.008582 | 0.138702  |
| 40                    | 1      | 0      | -9.818024               | -1.046513 | 1.664244  |
| 41                    | 1      | 0      | -11.069309              | -0.809879 | 0.396168  |
| 42                    | 1      | 0      | 1.596054                | -2.353105 | 0.852340  |
| 43                    | 1      | 0      | -0.862532               | -2.247782 | 0.850859  |
| 44                    | 1      | 0      | -0.699464               | 1.669724  | -0.901798 |

|    |   |   |          |          |           |
|----|---|---|----------|----------|-----------|
| 45 | 1 | 0 | 1.761342 | 1.572729 | -0.898936 |
|----|---|---|----------|----------|-----------|

Mulliken charges:

|    |   |           |    |   |           |
|----|---|-----------|----|---|-----------|
| 1  | C | -0.191496 | 24 | C | -0.179525 |
| 2  | C | 0.284787  | 25 | C | -0.187029 |
| 3  | C | 0.230319  | 26 | C | -0.080153 |
| 4  | C | 0.175875  | 27 | N | 0.359990  |
| 5  | C | 0.118480  | 28 | O | -0.398473 |
| 6  | C | -0.252542 | 29 | O | -0.420481 |
| 7  | N | -0.561391 | 30 | H | 0.241852  |
| 8  | S | 0.648934  | 31 | H | 0.215042  |
| 9  | N | -0.581953 | 32 | H | 0.190953  |
| 10 | C | -0.172583 | 33 | H | 0.187203  |
| 11 | C | -0.245740 | 34 | H | 0.187504  |
| 12 | C | 0.375341  | 35 | H | 0.191328  |
| 13 | C | -0.244584 | 36 | H | 0.189380  |
| 14 | C | -0.171234 | 37 | H | 0.196351  |
| 15 | N | -0.514209 | 38 | H | 0.200268  |
| 16 | C | -0.389169 | 39 | H | 0.197288  |
| 17 | C | -0.388624 | 40 | H | 0.188538  |
| 18 | C | -0.058825 | 41 | H | 0.200575  |
| 19 | C | -0.031225 | 42 | H | 0.197355  |
| 20 | C | 0.065223  | 43 | H | 0.199038  |
| 21 | C | -0.207415 | 44 | H | 0.198574  |
| 22 | C | -0.175021 | 45 | H | 0.208180  |
| 23 | C | 0.003294  |    |   |           |

Standard basis: 6-31G(d) (6D, 7F)

SCF Done: E(RPBE1PBE) = -1613.92365189 a.u.

**Table 4. BTN-1 Calculation of excited state geometry in chloroform solvent and dipole moments**

| Standard orientation: |        |        |                         |           |           |  |
|-----------------------|--------|--------|-------------------------|-----------|-----------|--|
| Center                | Atomic | Atomic | Coordinates (Angstroms) |           |           |  |
| Number                | Number | Type   | X                       | Y         | Z         |  |
| 1                     | 6      | 0      | 5.361551                | -1.867296 | -0.336899 |  |
| 2                     | 6      | 0      | 6.208173                | -0.804556 | -0.155957 |  |
| 3                     | 6      | 0      | 5.651638                | 0.486753  | 0.079402  |  |
| 4                     | 6      | 0      | 4.204441                | 0.617339  | 0.109198  |  |
| 5                     | 6      | 0      | 3.333047                | -0.508030 | -0.087864 |  |
| 6                     | 6      | 0      | 3.959068                | -1.721039 | -0.306842 |  |
| 7                     | 7      | 0      | 6.290699                | 1.634580  | 0.302310  |  |
| 8                     | 16     | 0      | 5.143989                | 2.760904  | 0.529496  |  |
| 9                     | 7      | 0      | 3.802530                | 1.864608  | 0.360785  |  |
| 10                    | 6      | 0      | -5.778473               | -1.166597 | 0.480595  |  |
| 11                    | 6      | 0      | -7.159329               | -1.111093 | 0.488505  |  |
| 12                    | 6      | 0      | -7.845785               | 0.022925  | -0.000590 |  |
| 13                    | 6      | 0      | -7.066231               | 1.090475  | -0.499637 |  |
| 14                    | 6      | 0      | -5.685860               | 1.024326  | -0.502704 |  |
| 15                    | 7      | 0      | -9.216057               | 0.085276  | 0.009245  |  |
| 16                    | 6      | 0      | -9.889126               | 1.242629  | -0.528651 |  |

|    |   |   |            |           |           |
|----|---|---|------------|-----------|-----------|
| 17 | 6 | 0 | -9.985376  | -1.034801 | 0.494337  |
| 18 | 6 | 0 | -3.589187  | -0.165132 | -0.019656 |
| 19 | 6 | 0 | -5.003970  | -0.103028 | -0.013480 |
| 20 | 6 | 0 | 1.868770   | -0.398750 | -0.051139 |
| 21 | 6 | 0 | 1.100308   | -1.463403 | 0.449202  |
| 22 | 6 | 0 | -0.281561  | -1.407843 | 0.463805  |
| 23 | 6 | 0 | -0.957583  | -0.278343 | -0.032997 |
| 24 | 6 | 0 | -0.190509  | 0.790201  | -0.531366 |
| 25 | 6 | 0 | 1.192356   | 0.733602  | -0.533370 |
| 26 | 6 | 0 | -2.372497  | -0.217301 | -0.025430 |
| 27 | 7 | 0 | 7.642514   | -1.042563 | -0.220627 |
| 28 | 8 | 0 | 8.383474   | -0.081032 | -0.127383 |
| 29 | 8 | 0 | 8.011172   | -2.201159 | -0.368461 |
| 30 | 1 | 0 | 5.803923   | -2.840016 | -0.520688 |
| 31 | 1 | 0 | 3.352754   | -2.600769 | -0.497175 |
| 32 | 1 | 0 | -5.277418  | -2.050951 | 0.863301  |
| 33 | 1 | 0 | -7.711546  | -1.958389 | 0.878647  |
| 34 | 1 | 0 | -7.544870  | 1.981486  | -0.889551 |
| 35 | 1 | 0 | -5.112006  | 1.860243  | -0.891942 |
| 36 | 1 | 0 | -9.613467  | 2.159767  | 0.009917  |
| 37 | 1 | 0 | -9.663335  | 1.392696  | -1.594238 |
| 38 | 1 | 0 | -10.967492 | 1.109496  | -0.429436 |
| 39 | 1 | 0 | -9.805185  | -1.945154 | -0.095408 |
| 40 | 1 | 0 | -9.757155  | -1.259610 | 1.545314  |
| 41 | 1 | 0 | -11.048036 | -0.796513 | 0.427883  |
| 42 | 1 | 0 | 1.598212   | -2.334157 | 0.866992  |
| 43 | 1 | 0 | -0.857563  | -2.233900 | 0.868976  |
| 44 | 1 | 0 | -0.698304  | 1.667498  | -0.919739 |
| 45 | 1 | 0 | 1.759502   | 1.571819  | -0.920804 |

Ground to excited state transition electric dipole moments (Au):

| state | X       | Y       | Z       | Dip. S. | Osc.   |
|-------|---------|---------|---------|---------|--------|
| 1     | 3.3916  | -0.0546 | -0.0117 | 11.5061 | 0.5249 |
| 2     | -2.3679 | 0.1001  | 0.0312  | 5.6177  | 0.4140 |
| 3     | -1.7467 | 0.1897  | 0.0323  | 3.0881  | 0.2414 |
| 4     | 3.0367  | -0.0132 | 0.0178  | 9.2221  | 0.7919 |
| 5     | -0.0536 | -0.0762 | 0.0671  | 0.0132  | 0.0012 |
| 6     | -0.0091 | -0.1017 | 0.0690  | 0.0152  | 0.0014 |
| 7     | -0.5575 | 0.3835  | 0.0902  | 0.4660  | 0.0438 |
| 8     | 0.0074  | -0.0256 | 0.0065  | 0.0007  | 0.0001 |
| 9     | 0.0075  | 0.0353  | 0.0086  | 0.0014  | 0.0001 |
| 10    | -0.0394 | -1.2250 | -0.2410 | 1.5604  | 0.1555 |
| 11    | 0.0377  | -0.0167 | 0.0481  | 0.0040  | 0.0004 |
| 12    | 0.8673  | -0.1760 | -0.0358 | 0.7845  | 0.0822 |
| 13    | 0.0478  | -0.6375 | 0.2979  | 0.4975  | 0.0522 |
| 14    | 0.2033  | 0.0141  | 0.0494  | 0.0439  | 0.0047 |
| 15    | -0.0136 | -0.0689 | 0.0047  | 0.0050  | 0.0005 |
| 16    | -1.2135 | -0.1417 | -0.0201 | 1.4931  | 0.1709 |
| 17    | 0.2012  | 0.1636  | 0.0314  | 0.0682  | 0.0079 |
| 18    | -0.3998 | 0.2392  | 0.0351  | 0.2183  | 0.0255 |
| 19    | 0.5513  | -0.2042 | -0.0277 | 0.3464  | 0.0420 |
| 20    | 0.2203  | -0.2789 | -0.0277 | 0.1271  | 0.0158 |
| 21    | 0.0552  | 0.1611  | -0.0939 | 0.0378  | 0.0047 |
| 22    | -0.0410 | -0.1013 | 0.0362  | 0.0133  | 0.0017 |
| 23    | 0.0658  | 0.1040  | -0.0318 | 0.0162  | 0.0020 |
| 24    | -0.0349 | 0.1371  | 0.0726  | 0.0253  | 0.0032 |



|    |         |         |         |        |        |
|----|---------|---------|---------|--------|--------|
| 25 | 0.1035  | 0.0634  | 0.1121  | 0.0273 | 0.0035 |
| 26 | 0.0050  | 0.2297  | -0.1099 | 0.0649 | 0.0084 |
| 27 | -0.2250 | -0.8927 | -0.1321 | 0.8651 | 0.1119 |
| 28 | 0.0193  | 0.0761  | -0.0113 | 0.0063 | 0.0008 |
| 29 | -0.0799 | -0.1616 | -0.0372 | 0.0339 | 0.0044 |
| 30 | -0.0226 | -0.5308 | 0.2392  | 0.3395 | 0.0450 |
| 31 | 0.1429  | 0.1685  | 0.0379  | 0.0502 | 0.0067 |
| 32 | -0.0677 | 0.0301  | 0.0062  | 0.0055 | 0.0007 |
| 33 | 0.1050  | 0.0034  | -0.0063 | 0.0111 | 0.0015 |
| 34 | 0.2827  | 0.0323  | 0.0334  | 0.0821 | 0.0113 |
| 35 | 0.2665  | 0.0719  | 0.1301  | 0.0931 | 0.0130 |
| 36 | 0.0214  | -0.0585 | -0.3270 | 0.1108 | 0.0156 |
| 37 | 0.0797  | 0.0998  | 0.0091  | 0.0164 | 0.0023 |
| 38 | -0.0798 | 0.1183  | 0.1729  | 0.0503 | 0.0071 |
| 39 | -0.0121 | 0.1932  | 0.4526  | 0.2423 | 0.0343 |
| 40 | -0.3477 | 0.0797  | 0.0492  | 0.1297 | 0.0186 |

Standard basis: TZVP (5D, 7F)

SCF Done:E(RPBE1PBE) = -1614.30781131 a.u.

**BTN-2 Theoretical calculation data supplement:**

**Table 5. BTN-2 Optimization of ground state geometry in vacuum**

| Standard orientation: |        |        |                         |           |           |
|-----------------------|--------|--------|-------------------------|-----------|-----------|
| Center                | Atomic | Atomic | Coordinates (Angstroms) |           |           |
| Number                | Number | Type   | X                       | Y         | Z         |
| 1                     | 6      | 0      | 1.808879                | -0.578643 | 0.017038  |
| 2                     | 6      | 0      | 1.094771                | -1.686173 | 0.315130  |
| 3                     | 6      | 0      | -0.247645               | -1.717091 | 0.346745  |
| 4                     | 6      | 0      | -0.998865               | -0.635662 | 0.068569  |
| 5                     | 6      | 0      | -0.306050               | 0.472304  | -0.247194 |
| 6                     | 6      | 0      | 1.037511                | 0.490993  | -0.270135 |
| 7                     | 6      | 0      | -2.346227               | -0.730106 | 0.114698  |
| 8                     | 6      | 0      | -3.247483               | 0.240140  | -0.132455 |
| 9                     | 6      | 0      | -4.595082               | 0.147295  | -0.087147 |
| 10                    | 6      | 0      | -5.341922               | 1.231657  | -0.368846 |
| 11                    | 6      | 0      | -6.684303               | 1.205081  | -0.341882 |
| 12                    | 6      | 0      | -7.391600               | 0.098215  | -0.032232 |
| 13                    | 6      | 0      | -6.630834               | -0.980999 | 0.248236  |
| 14                    | 6      | 0      | -5.287523               | -0.963085 | 0.223203  |
| 15                    | 7      | 0      | -8.673625               | 0.074579  | -0.006846 |
| 16                    | 6      | 0      | -9.379903               | -1.185178 | 0.345763  |
| 17                    | 6      | 0      | -9.439217               | 1.307269  | -0.330303 |
| 18                    | 6      | 0      | 3.170586                | -0.568451 | -0.007260 |
| 19                    | 6      | 0      | 3.862474                | -1.719112 | -0.152227 |
| 20                    | 6      | 0      | 5.201096                | -1.782827 | -0.217913 |
| 21                    | 6      | 0      | 5.980005                | -0.689308 | -0.132067 |
| 22                    | 6      | 0      | 5.312503                | 0.472914  | 0.034132  |
| 23                    | 6      | 0      | 3.957713                | 0.529012  | 0.095099  |
| 24                    | 7      | 0      | 5.884182                | 1.598709  | 0.158201  |
| 25                    | 16     | 0      | 4.776322                | 2.865842  | 0.384929  |
| 26                    | 7      | 0      | 3.536368                | 1.707971  | 0.298189  |
| 27                    | 7      | 0      | 7.233365                | -0.800895 | -0.206913 |
| 28                    | 8      | 0      | 8.080945                | 0.199784  | -0.138563 |
| 29                    | 8      | 0      | 7.834934                | -1.959194 | -0.368400 |
| 30                    | 1      | 0      | 1.572498                | -2.635715 | 0.603712  |
| 31                    | 1      | 0      | -0.726333               | -2.673528 | 0.624903  |

|    |   |   |            |           |           |
|----|---|---|------------|-----------|-----------|
| 32 | 1 | 0 | -0.813228  | 1.410539  | -0.522512 |
| 33 | 1 | 0 | 1.462527   | 1.446456  | -0.609193 |
| 34 | 1 | 0 | -2.740508  | -1.721811 | 0.387760  |
| 35 | 1 | 0 | -2.852177  | 1.231654  | -0.404661 |
| 36 | 1 | 0 | -4.861024  | 2.190186  | -0.634955 |
| 37 | 1 | 0 | -7.172064  | 2.160641  | -0.592872 |
| 38 | 1 | 0 | -7.075821  | -1.952531 | 0.517322  |
| 39 | 1 | 0 | -4.782310  | -1.909777 | 0.471365  |
| 40 | 1 | 0 | -9.168002  | -1.991690 | -0.392696 |
| 41 | 1 | 0 | -9.138694  | -1.510925 | 1.383174  |
| 42 | 1 | 0 | -10.482606 | -1.039721 | 0.324904  |
| 43 | 1 | 0 | -9.228428  | 2.121242  | 0.400182  |
| 44 | 1 | 0 | -9.250850  | 1.641454  | -1.375975 |
| 45 | 1 | 0 | -10.534092 | 1.121274  | -0.266651 |
| 46 | 1 | 0 | 3.365538   | -2.693036 | -0.285371 |
| 47 | 1 | 0 | 5.642048   | -2.784922 | -0.363739 |

Standard basis: 6-31G(d) (6D, 7F)

SCF Done: E(RB3LYP) = -1616.61870359 a.u.

Thermal correction to Gibbs Free Energy = 0.302386 a.u.

**Table 6. BTN-2 Calculation of excited state geometry in vacuum and dipole moments**

Standard orientation:

| Center<br>Number | Atomic<br>Number | Atomic<br>Type | Coordinates (Angstroms) |           |           |
|------------------|------------------|----------------|-------------------------|-----------|-----------|
|                  |                  |                | X                       | Y         | Z         |
| 1                | 6                | 0              | 1.839197                | -0.579703 | 0.021578  |
| 2                | 6                | 0              | 1.154066                | -1.704405 | 0.507519  |
| 3                | 6                | 0              | -0.228589               | -1.732899 | 0.555353  |
| 4                | 6                | 0              | -1.003884               | -0.646535 | 0.113598  |
| 5                | 6                | 0              | -0.311093               | 0.478772  | -0.369256 |
| 6                | 6                | 0              | 1.070568                | 0.516392  | -0.408318 |
| 7                | 6                | 0              | -2.453761               | -0.741339 | 0.184778  |
| 8                | 6                | 0              | -3.341923               | 0.196738  | -0.207291 |
| 9                | 6                | 0              | -4.790783               | 0.122135  | -0.144921 |
| 10               | 6                | 0              | -5.556881               | 1.197328  | -0.621175 |
| 11               | 6                | 0              | -6.940223               | 1.193728  | -0.592558 |
| 12               | 6                | 0              | -7.648026               | 0.087327  | -0.078359 |
| 13               | 6                | 0              | -6.883397               | -0.996249 | 0.412003  |
| 14               | 6                | 0              | -5.502900               | -0.972531 | 0.374391  |
| 15               | 7                | 0              | -9.021070               | 0.060821  | -0.055371 |
| 16               | 6                | 0              | -9.709135               | -1.040374 | 0.573825  |
| 17               | 6                | 0              | -9.766297               | 1.224795  | -0.469193 |
| 18               | 6                | 0              | 3.304421                | -0.588014 | -0.054966 |
| 19               | 6                | 0              | 4.006053                | -1.752212 | -0.311468 |
| 20               | 6                | 0              | 5.413175                | -1.802551 | -0.379957 |
| 21               | 6                | 0              | 6.191899                | -0.687957 | -0.202462 |
| 22               | 6                | 0              | 5.555972                | 0.558645  | 0.069942  |
| 23               | 6                | 0              | 4.104271                | 0.590473  | 0.139556  |
| 24               | 7                | 0              | 6.122352                | 1.743295  | 0.296413  |
| 25               | 16               | 0              | 4.909106                | 2.785892  | 0.573865  |
| 26               | 7                | 0              | 3.626824                | 1.803439  | 0.424230  |
| 27               | 7                | 0              | 7.635735                | -0.827459 | -0.308307 |
| 28               | 8                | 0              | 8.313800                | 0.179423  | -0.211816 |
| 29               | 8                | 0              | 8.077447                | -1.955396 | -0.491457 |
| 30               | 1                | 0              | 1.715415                | -2.553556 | 0.887953  |
| 31               | 1                | 0              | -0.730504               | -2.612280 | 0.952398  |

|    |   |   |            |           |           |
|----|---|---|------------|-----------|-----------|
| 32 | 1 | 0 | -0.863093  | 1.344608  | -0.722708 |
| 33 | 1 | 0 | 1.568355   | 1.402418  | -0.784747 |
| 34 | 1 | 0 | -2.825582  | -1.677976 | 0.598394  |
| 35 | 1 | 0 | -2.961532  | 1.128647  | -0.625517 |
| 36 | 1 | 0 | -5.045939  | 2.068528  | -1.026499 |
| 37 | 1 | 0 | -7.473113  | 2.058330  | -0.971587 |
| 38 | 1 | 0 | -7.376841  | -1.866547 | 0.829789  |
| 39 | 1 | 0 | -4.964890  | -1.831645 | 0.765913  |
| 40 | 1 | 0 | -9.464885  | -1.994841 | 0.089425  |
| 41 | 1 | 0 | -9.467222  | -1.129374 | 1.643583  |
| 42 | 1 | 0 | -10.786047 | -0.889840 | 0.482122  |
| 43 | 1 | 0 | -9.548583  | 2.104651  | 0.154816  |
| 44 | 1 | 0 | -9.550791  | 1.487201  | -1.513272 |
| 45 | 1 | 0 | -10.834194 | 1.012894  | -0.395137 |
| 46 | 1 | 0 | 3.455649   | -2.667762 | -0.502485 |
| 47 | 1 | 0 | 5.914850   | -2.739992 | -0.592576 |

Ground to excited state transition electric dipole moments (Au):

| state | X       | Y       | Z       | Dip. S. | Osc.   |
|-------|---------|---------|---------|---------|--------|
| 1     | 3.1219  | -0.0087 | -0.0100 | 9.7466  | 0.4660 |
| 2     | -2.2060 | 0.0169  | 0.0400  | 4.8684  | 0.3667 |
| 3     | -2.6410 | 0.2023  | 0.0130  | 7.0157  | 0.5613 |
| 4     | -0.1827 | 0.0238  | -0.0124 | 0.0341  | 0.0029 |
| 5     | -1.9468 | 0.0417  | -0.0379 | 3.7932  | 0.3274 |
| 6     | 0.1599  | 0.0999  | -0.0638 | 0.0396  | 0.0036 |
| 7     | -0.4134 | 0.1500  | 0.0946  | 0.2024  | 0.0193 |
| 8     | 0.0717  | -0.0151 | 0.0052  | 0.0054  | 0.0005 |
| 9     | 0.0423  | -0.0119 | 0.0513  | 0.0046  | 0.0005 |
| 10    | -0.1537 | -0.7696 | -0.2859 | 0.6977  | 0.0719 |
| 11    | -0.4581 | 0.8128  | -0.1387 | 0.8897  | 0.0927 |
| 12    | 0.4371  | 0.0445  | 0.0583  | 0.1964  | 0.0207 |
| 13    | 0.9721  | -0.2510 | -0.0087 | 1.0081  | 0.1076 |
| 14    | 0.7254  | -0.0679 | -0.0142 | 0.5310  | 0.0571 |
| 15    | 0.5702  | 0.0125  | 0.1057  | 0.3365  | 0.0379 |
| 16    | -0.0590 | 0.2326  | 0.0448  | 0.0596  | 0.0069 |
| 17    | -0.0375 | 0.2691  | 0.0241  | 0.0744  | 0.0086 |
| 18    | 0.0662  | 0.3645  | 0.0641  | 0.1414  | 0.0170 |
| 19    | -0.0289 | 0.0334  | -0.0033 | 0.0020  | 0.0002 |
| 20    | 0.3709  | -0.1190 | -0.0648 | 0.1559  | 0.0189 |
| 21    | 0.2853  | -0.3474 | 0.1002  | 0.2121  | 0.0262 |
| 22    | 0.0757  | -0.0195 | -0.0610 | 0.0098  | 0.0012 |
| 23    | 0.0653  | -0.0212 | 0.0499  | 0.0072  | 0.0009 |
| 24    | 0.4605  | -0.4798 | 0.1975  | 0.4812  | 0.0614 |
| 25    | 0.0798  | -0.0735 | 0.0236  | 0.0123  | 0.0016 |
| 26    | 0.1078  | -0.0033 | 0.0113  | 0.0118  | 0.0015 |
| 27    | -0.3412 | 0.4467  | 0.0243  | 0.3166  | 0.0418 |
| 28    | -0.3025 | -0.3646 | 0.0513  | 0.2271  | 0.0304 |
| 29    | 0.1804  | 0.3231  | 0.3914  | 0.2901  | 0.0389 |
| 30    | 0.2303  | -0.1734 | 0.1013  | 0.0934  | 0.0126 |
| 31    | 0.2656  | -0.0386 | -0.0569 | 0.0753  | 0.0103 |
| 32    | 0.0116  | -0.0191 | -0.0608 | 0.0042  | 0.0006 |
| 33    | -0.4289 | -0.0786 | -0.2375 | 0.2465  | 0.0341 |
| 34    | 0.0125  | 0.0282  | -0.0689 | 0.0057  | 0.0008 |
| 35    | 0.1293  | 0.0638  | 0.0113  | 0.0209  | 0.0029 |
| 36    | 0.1154  | -0.2306 | 0.1949  | 0.1045  | 0.0147 |
| 37    | 0.0924  | -0.4884 | -0.0299 | 0.2480  | 0.0354 |

|    |        |         |         |        |        |
|----|--------|---------|---------|--------|--------|
| 38 | 0.2892 | -0.1535 | -0.0266 | 0.1079 | 0.0154 |
| 39 | 0.1616 | -0.5672 | -0.0223 | 0.3483 | 0.0502 |
| 40 | 0.3510 | -0.2760 | -0.0226 | 0.1999 | 0.0292 |

Standard basis: TZVP (5D, 7F)

SCF Done: E(RPBE1PBE) = -1615.54111796 a.u.

**Table 7. BTN-2 Optimization of Ground State Geometry in Chloroform Solvent and Mulliken charges**

Standard orientation:

| Center<br>Number | Atomic<br>Number | Atomic<br>Type | Coordinates (Angstroms) |           |           |
|------------------|------------------|----------------|-------------------------|-----------|-----------|
|                  |                  |                | X                       | Y         | Z         |
| 1                | 6                | 0              | 1.839483                | -0.579486 | 0.035037  |
| 2                | 6                | 0              | 1.155212                | -1.700340 | 0.533616  |
| 3                | 6                | 0              | -0.227636               | -1.727048 | 0.585546  |
| 4                | 6                | 0              | -1.003491               | -0.644574 | 0.131600  |
| 5                | 6                | 0              | -0.311584               | 0.475532  | -0.367633 |
| 6                | 6                | 0              | 1.070366                | 0.512043  | -0.408576 |
| 7                | 6                | 0              | -2.453262               | -0.739089 | 0.203924  |
| 8                | 6                | 0              | -3.340534               | 0.194708  | -0.205230 |
| 9                | 6                | 0              | -4.789223               | 0.121479  | -0.144302 |
| 10               | 6                | 0              | -5.554004               | 1.189348  | -0.643075 |
| 11               | 6                | 0              | -6.937652               | 1.186206  | -0.618427 |
| 12               | 6                | 0              | -7.648009               | 0.088081  | -0.084866 |
| 13               | 6                | 0              | -6.883939               | -0.987574 | 0.428801  |
| 14               | 6                | 0              | -5.503109               | -0.964830 | 0.394040  |
| 15               | 7                | 0              | -9.018241               | 0.061248  | -0.066638 |
| 16               | 6                | 0              | -9.709476               | -1.029177 | 0.581816  |
| 17               | 6                | 0              | -9.764128               | 1.216700  | -0.508552 |
| 18               | 6                | 0              | 3.303747                | -0.589673 | -0.045340 |
| 19               | 6                | 0              | 4.001558                | -1.755944 | -0.307448 |
| 20               | 6                | 0              | 5.406318                | -1.806034 | -0.388783 |
| 21               | 6                | 0              | 6.186920                | -0.689404 | -0.217114 |
| 22               | 6                | 0              | 5.554458                | 0.556854  | 0.066664  |
| 23               | 6                | 0              | 4.105456                | 0.587708  | 0.150306  |
| 24               | 7                | 0              | 6.119740                | 1.742346  | 0.295520  |
| 25               | 16               | 0              | 4.911721                | 2.786302  | 0.596066  |
| 26               | 7                | 0              | 3.633264                | 1.798689  | 0.453940  |
| 27               | 7                | 0              | 7.626693                | -0.825427 | -0.337911 |
| 28               | 8                | 0              | 8.312203                | 0.179121  | -0.247389 |
| 29               | 8                | 0              | 8.080730                | -1.948285 | -0.526881 |
| 30               | 1                | 0              | 1.716083                | -2.547269 | 0.919399  |
| 31               | 1                | 0              | -0.728495               | -2.602324 | 0.992591  |
| 32               | 1                | 0              | -0.863317               | 1.336086  | -0.734330 |
| 33               | 1                | 0              | 1.566687                | 1.390983  | -0.803539 |
| 34               | 1                | 0              | -2.824718               | -1.669691 | 0.631531  |
| 35               | 1                | 0              | -2.959769               | 1.119616  | -0.638939 |
| 36               | 1                | 0              | -5.041925               | 2.052912  | -1.063298 |
| 37               | 1                | 0              | -7.469404               | 2.043553  | -1.015075 |
| 38               | 1                | 0              | -7.378677               | -1.849830 | 0.861413  |
| 39               | 1                | 0              | -4.966951               | -1.817238 | 0.802843  |
| 40               | 1                | 0              | -9.462752               | -1.993056 | 0.118599  |
| 41               | 1                | 0              | -9.472229               | -1.095543 | 1.653702  |
| 42               | 1                | 0              | -10.785449              | -0.880477 | 0.482316  |
| 43               | 1                | 0              | -9.550669               | 2.108503  | 0.098826  |
| 44               | 1                | 0              | -9.544331               | 1.458686  | -1.556302 |
| 45               | 1                | 0              | -10.831404              | 1.004124  | -0.434852 |
| 46               | 1                | 0              | 3.451231                | -2.671900 | -0.495059 |

|    |   |   |          |           |           |
|----|---|---|----------|-----------|-----------|
| 47 | 1 | 0 | 5.900079 | -2.745565 | -0.609126 |
|----|---|---|----------|-----------|-----------|

Mulliken charges:

|    |   |           |    |   |           |
|----|---|-----------|----|---|-----------|
| 1  | C | 0.054657  | 25 | S | 0.647177  |
| 2  | C | -0.201646 | 26 | N | -0.575990 |
| 3  | C | -0.245899 | 27 | N | 0.371758  |
| 4  | C | 0.140146  | 28 | O | -0.404577 |
| 5  | C | -0.231476 | 29 | O | -0.425595 |
| 6  | C | -0.182680 | 30 | H | 0.192505  |
| 7  | C | -0.239251 | 31 | H | 0.187188  |
| 8  | C | -0.214191 | 32 | H | 0.188142  |
| 9  | C | 0.116594  | 33 | H | 0.202460  |
| 10 | C | -0.243895 | 34 | H | 0.175440  |
| 11 | C | -0.241941 | 35 | H | 0.178628  |
| 12 | C | 0.368962  | 36 | H | 0.180200  |
| 13 | C | -0.240714 | 37 | H | 0.183376  |
| 14 | C | -0.225726 | 38 | H | 0.183831  |
| 15 | N | -0.508542 | 39 | H | 0.181616  |
| 16 | C | -0.390425 | 40 | H | 0.195273  |
| 17 | C | -0.390489 | 41 | H | 0.190142  |
| 18 | C | 0.123324  | 42 | H | 0.199073  |
| 19 | C | -0.256142 | 43 | H | 0.190042  |
| 20 | C | -0.194193 | 44 | H | 0.195245  |
| 21 | C | 0.283206  | 45 | H | 0.198858  |
| 22 | C | 0.224821  | 46 | H | 0.211858  |
| 23 | C | 0.166611  | 47 | H | 0.239348  |
| 24 | N | -0.557108 |    |   |           |

Standard basis: 6-31G(d) (6D, 7F)

SCF Done: E(RPBE1PBE) = -1615.17170929 a.u.

**Table 8. BTN-2 Calculation of excited state geometry in chloroform solvent and dipole moments**

| Standard orientation: |        |        |                         |           |           |  |
|-----------------------|--------|--------|-------------------------|-----------|-----------|--|
| Center                | Atomic | Atomic | Coordinates (Angstroms) |           |           |  |
| Number                | Number | Type   | X                       | Y         | Z         |  |
| 1                     | 6      | 0      | 1.839197                | -0.579703 | 0.021578  |  |
| 2                     | 6      | 0      | 1.154066                | -1.704405 | 0.507519  |  |
| 3                     | 6      | 0      | -0.228589               | -1.732899 | 0.555353  |  |
| 4                     | 6      | 0      | -1.003884               | -0.646535 | 0.113598  |  |
| 5                     | 6      | 0      | -0.311093               | 0.478772  | -0.369256 |  |
| 6                     | 6      | 0      | 1.070568                | 0.516392  | -0.408318 |  |
| 7                     | 6      | 0      | -2.453761               | -0.741339 | 0.184778  |  |
| 8                     | 6      | 0      | -3.341923               | 0.196738  | -0.207291 |  |
| 9                     | 6      | 0      | -4.790783               | 0.122135  | -0.144921 |  |
| 10                    | 6      | 0      | -5.556881               | 1.197328  | -0.621175 |  |
| 11                    | 6      | 0      | -6.940223               | 1.193728  | -0.592558 |  |
| 12                    | 6      | 0      | -7.648026               | 0.087327  | -0.078359 |  |
| 13                    | 6      | 0      | -6.883397               | -0.996249 | 0.412003  |  |
| 14                    | 6      | 0      | -5.502900               | -0.972531 | 0.374391  |  |

|    |    |   |            |           |           |
|----|----|---|------------|-----------|-----------|
| 15 | 7  | 0 | -9.021070  | 0.060821  | -0.055371 |
| 16 | 6  | 0 | -9.709135  | -1.040374 | 0.573825  |
| 17 | 6  | 0 | -9.766297  | 1.224795  | -0.469193 |
| 18 | 6  | 0 | 3.304421   | -0.588014 | -0.054966 |
| 19 | 6  | 0 | 4.006053   | -1.752212 | -0.311468 |
| 20 | 6  | 0 | 5.413175   | -1.802551 | -0.379957 |
| 21 | 6  | 0 | 6.191899   | -0.687957 | -0.202462 |
| 22 | 6  | 0 | 5.555972   | 0.558645  | 0.069942  |
| 23 | 6  | 0 | 4.104271   | 0.590473  | 0.139556  |
| 24 | 7  | 0 | 6.122352   | 1.743295  | 0.296413  |
| 25 | 16 | 0 | 4.909106   | 2.785892  | 0.573865  |
| 26 | 7  | 0 | 3.626824   | 1.803439  | 0.424230  |
| 27 | 7  | 0 | 7.635735   | -0.827459 | -0.308307 |
| 28 | 8  | 0 | 8.313800   | 0.179423  | -0.211816 |
| 29 | 8  | 0 | 8.077447   | -1.955396 | -0.491457 |
| 30 | 1  | 0 | 1.715415   | -2.553556 | 0.887953  |
| 31 | 1  | 0 | -0.730504  | -2.612280 | 0.952398  |
| 32 | 1  | 0 | -0.863093  | 1.344608  | -0.722708 |
| 33 | 1  | 0 | 1.568355   | 1.402418  | -0.784747 |
| 34 | 1  | 0 | -2.825582  | -1.677976 | 0.598394  |
| 35 | 1  | 0 | -2.961532  | 1.128647  | -0.625517 |
| 36 | 1  | 0 | -5.045939  | 2.068528  | -1.026499 |
| 37 | 1  | 0 | -7.473113  | 2.058330  | -0.971587 |
| 38 | 1  | 0 | -7.376841  | -1.866547 | 0.829789  |
| 39 | 1  | 0 | -4.964890  | -1.831645 | 0.765913  |
| 40 | 1  | 0 | -9.464885  | -1.994841 | 0.089425  |
| 41 | 1  | 0 | -9.467222  | -1.129374 | 1.643583  |
| 42 | 1  | 0 | -10.786047 | -0.889840 | 0.482122  |
| 43 | 1  | 0 | -9.548583  | 2.104651  | 0.154816  |
| 44 | 1  | 0 | -9.550791  | 1.487201  | -1.513272 |
| 45 | 1  | 0 | -10.834194 | 1.012894  | -0.395137 |
| 46 | 1  | 0 | 3.455649   | -2.667762 | -0.502485 |
| 47 | 1  | 0 | 5.914850   | -2.739992 | -0.592576 |

Ground to excited state transition electric dipole moments (Au):

| state | X       | Y       | Z       | Dip. S. | Osc.   |
|-------|---------|---------|---------|---------|--------|
| 1     | 3.6855  | -0.0362 | -0.0141 | 13.5842 | 0.5840 |
| 2     | -2.4230 | 0.0293  | 0.0454  | 5.8736  | 0.4198 |
| 3     | -2.0805 | 0.2382  | 0.0329  | 4.3863  | 0.3282 |
| 4     | 2.6497  | -0.1320 | 0.0536  | 7.0413  | 0.5679 |
| 5     | -0.0589 | -0.1153 | 0.0722  | 0.0220  | 0.0019 |
| 6     | 0.0635  | -0.0661 | 0.0259  | 0.0091  | 0.0008 |
| 7     | 0.6953  | -0.2295 | -0.1297 | 0.5529  | 0.0511 |
| 8     | 0.0968  | -0.0151 | -0.0200 | 0.0100  | 0.0009 |
| 9     | -0.0757 | -1.1661 | -0.2840 | 1.4462  | 0.1441 |
| 10    | 0.8787  | -0.7157 | 0.1911  | 1.3208  | 0.1355 |
| 11    | 0.5622  | 0.2410  | -0.1613 | 0.4002  | 0.0412 |
| 12    | 0.0895  | -0.0556 | 0.0497  | 0.0136  | 0.0014 |
| 13    | 0.4179  | 0.0363  | 0.0303  | 0.1769  | 0.0184 |
| 14    | 0.0771  | -0.0909 | -0.0012 | 0.0142  | 0.0015 |
| 15    | -0.9960 | 0.1224  | -0.1124 | 1.0196  | 0.1123 |
| 16    | -0.0906 | 0.2956  | 0.0518  | 0.0983  | 0.0111 |
| 17    | -0.0653 | 0.1190  | 0.0045  | 0.0184  | 0.0021 |
| 18    | 0.4412  | -0.2478 | -0.0475 | 0.2583  | 0.0305 |
| 19    | -0.3249 | 0.2926  | -0.0070 | 0.1912  | 0.0233 |
| 20    | 0.0109  | 0.1551  | -0.1278 | 0.0405  | 0.0050 |

|    |         |         |         |        |        |
|----|---------|---------|---------|--------|--------|
| 21 | 0.0502  | -0.1205 | 0.0055  | 0.0171 | 0.0021 |
| 22 | -0.4180 | 0.5131  | -0.2238 | 0.4881 | 0.0612 |
| 23 | 0.1678  | -0.0654 | 0.0762  | 0.0383 | 0.0048 |
| 24 | -0.0217 | -0.0319 | -0.0270 | 0.0022 | 0.0003 |
| 25 | -0.0936 | 0.2799  | 0.0559  | 0.0902 | 0.0115 |
| 26 | -0.2145 | 0.2615  | -0.1211 | 0.1291 | 0.0166 |
| 27 | -0.0633 | -0.9020 | -0.1016 | 0.8279 | 0.1068 |
| 28 | 0.0769  | 0.1426  | 0.0438  | 0.0281 | 0.0037 |
| 29 | -0.3875 | -0.1796 | -0.1443 | 0.2032 | 0.0267 |
| 30 | 0.0622  | 0.0667  | 0.0528  | 0.0111 | 0.0015 |
| 31 | -0.3417 | 0.1838  | 0.0487  | 0.1529 | 0.0209 |
| 32 | 0.1975  | 0.0312  | 0.0468  | 0.0422 | 0.0058 |
| 33 | 0.4440  | 0.0373  | 0.0605  | 0.2021 | 0.0277 |
| 34 | -0.2049 | 0.0694  | -0.4957 | 0.2926 | 0.0405 |
| 35 | 0.0197  | 0.2208  | 0.2878  | 0.1320 | 0.0184 |
| 36 | -0.0267 | -0.0364 | 0.0200  | 0.0024 | 0.0003 |
| 37 | 0.3086  | -0.9008 | -0.0078 | 0.9067 | 0.1283 |
| 38 | -0.1274 | -0.2536 | 0.0186  | 0.0809 | 0.0115 |
| 39 | -0.1783 | 0.1297  | 0.0068  | 0.0487 | 0.0070 |
| 40 | -0.3399 | 0.2686  | -0.0007 | 0.1877 | 0.0270 |

Standard basis: TZVP (5D, 7F)

SCF Done: E(RPBE1PBE) = -1615.55439277 a.u.

**BTN-3 Theoretical calculation data supplement :**

**Table 9. BTN-3 Optimization of ground state geometry in vacuum**

| Standard orientation: |        |        |                         |           |           |
|-----------------------|--------|--------|-------------------------|-----------|-----------|
| Center                | Atomic | Atomic | Coordinates (Angstroms) |           |           |
| Number                | Number | Type   | X                       | Y         | Z         |
| 1                     | 6      | 0      | -6.826228               | -1.792691 | 0.001813  |
| 2                     | 6      | 0      | -7.528823               | -0.606668 | 0.001769  |
| 3                     | 6      | 0      | -6.809099               | 0.631810  | 0.001082  |
| 4                     | 6      | 0      | -5.352518               | 0.576162  | 0.000454  |
| 5                     | 6      | 0      | -4.642146               | -0.680208 | 0.000511  |
| 6                     | 6      | 0      | -5.416111               | -1.836424 | 0.001203  |
| 7                     | 7      | 0      | -7.288065               | 1.879327  | 0.000913  |
| 8                     | 16     | 0      | -5.984090               | 2.877956  | 0.000106  |
| 9                     | 7      | 0      | -4.768430               | 1.775080  | -0.000173 |
| 10                    | 6      | 0      | -0.599990               | -0.749746 | 0.003908  |
| 11                    | 6      | 0      | 0.122725                | -1.961388 | -0.001561 |
| 12                    | 6      | 0      | 1.508270                | -1.951586 | -0.002205 |
| 13                    | 6      | 0      | 2.244299                | -0.746155 | -0.002587 |
| 14                    | 6      | 0      | 1.509406                | 0.461860  | 0.002886  |
| 15                    | 6      | 0      | 0.125914                | 0.464024  | 0.008707  |
| 16                    | 6      | 0      | -2.015150               | -0.740578 | 0.004543  |
| 17                    | 6      | 0      | 3.700029                | -0.811689 | -0.003243 |
| 18                    | 6      | 0      | -3.234280               | -0.711415 | 0.005084  |
| 19                    | 6      | 0      | 4.559327                | 0.235235  | 0.001698  |
| 20                    | 6      | 0      | 6.013870                | 0.190490  | -0.009363 |
| 21                    | 6      | 0      | 6.742371                | 1.395687  | -0.014706 |
| 22                    | 6      | 0      | 8.128650                | 1.427789  | -0.030922 |
| 23                    | 6      | 0      | 8.881127                | 0.229255  | -0.057455 |
| 24                    | 6      | 0      | 8.154736                | -0.989295 | -0.031292 |
| 25                    | 6      | 0      | 6.770432                | -0.999522 | -0.015076 |
| 26                    | 7      | 0      | 10.260837               | 0.242889  | -0.110116 |
| 27                    | 6      | 0      | 11.003914               | -1.005373 | 0.076922  |

|    |   |   |           |           |           |
|----|---|---|-----------|-----------|-----------|
| 28 | 6 | 0 | 10.975242 | 1.507658  | 0.072047  |
| 29 | 7 | 0 | -8.988964 | -0.666970 | 0.002421  |
| 30 | 8 | 0 | -9.610336 | 0.392477  | 0.002239  |
| 31 | 8 | 0 | -9.511804 | -1.787062 | 0.003027  |
| 32 | 1 | 0 | -7.395251 | -2.714501 | 0.002348  |
| 33 | 1 | 0 | -4.920399 | -2.800959 | 0.001273  |
| 34 | 1 | 0 | -0.418473 | -2.902605 | -0.006475 |
| 35 | 1 | 0 | 2.047405  | -2.895790 | -0.007611 |
| 36 | 1 | 0 | 2.032029  | 1.413265  | 0.007779  |
| 37 | 1 | 0 | -0.420247 | 1.402246  | 0.008894  |
| 38 | 1 | 0 | 4.104908  | -1.822432 | -0.019125 |
| 39 | 1 | 0 | 4.146840  | 1.243650  | 0.012417  |
| 40 | 1 | 0 | 6.199442  | 2.338591  | 0.001289  |
| 41 | 1 | 0 | 8.628313  | 2.389081  | -0.025783 |
| 42 | 1 | 0 | 8.680424  | -1.936753 | -0.026453 |
| 43 | 1 | 0 | 6.265442  | -1.961333 | 0.000615  |
| 44 | 1 | 0 | 10.835931 | -1.472526 | 1.080474  |
| 45 | 1 | 0 | 10.731068 | -1.753542 | -0.697458 |
| 46 | 1 | 0 | 12.072748 | -0.786454 | -0.032839 |
| 47 | 1 | 0 | 10.682335 | 2.245530  | -0.707304 |
| 48 | 1 | 0 | 10.797698 | 1.974433  | 1.070534  |
| 49 | 1 | 0 | 12.048901 | 1.313798  | -0.043029 |

Standard basis: 6-31G(d) (6D, 7F)

SCF Done: E(RB3LYP) = -1692.96375710 a.u.

Thermal correction to Gibbs Free Energy = 0.307574

**Table 10. BTN-3 Calculation of excited state geometry in vacuum and dipole moments**

Standard orientation:

| Center<br>Number | Atomic<br>Number | Atomic<br>Type | Coordinates (Angstroms) |           |           |
|------------------|------------------|----------------|-------------------------|-----------|-----------|
|                  |                  |                | X                       | Y         | Z         |
| 1                | 6                | 0              | -6.813856               | -1.784072 | -0.000925 |
| 2                | 6                | 0              | -7.507057               | -0.597568 | 0.001797  |
| 3                | 6                | 0              | -6.782687               | 0.631746  | 0.003487  |
| 4                | 6                | 0              | -5.334836               | 0.568522  | 0.002255  |
| 5                | 6                | 0              | -4.632419               | -0.685110 | -0.000588 |
| 6                | 6                | 0              | -5.407117               | -1.835319 | -0.002112 |
| 7                | 7                | 0              | -7.250846               | 1.880045  | 0.006120  |
| 8                | 16               | 0              | -5.951027               | 2.855479  | 0.006952  |
| 9                | 7                | 0              | -4.748895               | 1.763407  | 0.003973  |
| 10               | 6                | 0              | -0.595616               | -0.755588 | -0.003714 |
| 11               | 6                | 0              | 0.123569                | -1.963520 | -0.006522 |
| 12               | 6                | 0              | 1.506081                | -1.952284 | -0.007417 |
| 13               | 6                | 0              | 2.237455                | -0.749525 | -0.005701 |
| 14               | 6                | 0              | 1.505289                | 0.454599  | -0.002535 |
| 15               | 6                | 0              | 0.124885                | 0.455587  | -0.001701 |
| 16               | 6                | 0              | -2.008680               | -0.746789 | -0.002672 |
| 17               | 6                | 0              | 3.689483                | -0.813680 | -0.007055 |
| 18               | 6                | 0              | -3.226531               | -0.718547 | -0.001720 |
| 19               | 6                | 0              | 4.542326                | 0.233780  | -0.010744 |
| 20               | 6                | 0              | 5.992951                | 0.190881  | -0.011871 |
| 21               | 6                | 0              | 6.717388                | 1.393239  | -0.022443 |
| 22               | 6                | 0              | 8.100332                | 1.426733  | -0.023931 |
| 23               | 6                | 0              | 8.850483                | 0.231927  | -0.018295 |
| 24               | 6                | 0              | 8.128233                | -0.983876 | -0.001412 |
| 25               | 6                | 0              | 6.747353                | -0.995131 | 0.000047  |
| 26               | 7                | 0              | 10.222759               | 0.246389  | -0.029965 |



|    |   |   |           |           |           |
|----|---|---|-----------|-----------|-----------|
| 27 | 6 | 0 | 10.958103 | -0.992439 | 0.050789  |
| 28 | 6 | 0 | 10.927544 | 1.504043  | 0.025393  |
| 29 | 7 | 0 | -8.960155 | -0.648415 | 0.002847  |
| 30 | 8 | 0 | -9.565443 | 0.408465  | 0.005249  |
| 31 | 8 | 0 | -9.483206 | -1.756369 | 0.001215  |
| 32 | 1 | 0 | -7.391033 | -2.701913 | -0.002164 |
| 33 | 1 | 0 | -4.914527 | -2.801628 | -0.004276 |
| 34 | 1 | 0 | -0.417949 | -2.904669 | -0.007989 |
| 35 | 1 | 0 | 2.046989  | -2.895690 | -0.009697 |
| 36 | 1 | 0 | 2.027398  | 1.406633  | -0.000263 |
| 37 | 1 | 0 | -0.423614 | 1.392665  | 0.000783  |
| 38 | 1 | 0 | 4.097182  | -1.823689 | -0.005748 |
| 39 | 1 | 0 | 4.126842  | 1.241439  | -0.014317 |
| 40 | 1 | 0 | 6.172861  | 2.335452  | -0.027930 |
| 41 | 1 | 0 | 8.600313  | 2.388577  | -0.028670 |
| 42 | 1 | 0 | 8.655891  | -1.930897 | 0.012002  |
| 43 | 1 | 0 | 6.242874  | -1.957468 | 0.013482  |
| 44 | 1 | 0 | 10.748839 | -1.540707 | 0.981156  |
| 45 | 1 | 0 | 10.726017 | -1.654784 | -0.793915 |
| 46 | 1 | 0 | 12.027459 | -0.777757 | 0.019332  |
| 47 | 1 | 0 | 10.678271 | 2.143054  | -0.832354 |
| 48 | 1 | 0 | 10.703772 | 2.065586  | 0.944451  |
| 49 | 1 | 0 | 12.001957 | 1.315724  | -0.002103 |

Ground to excited state transition electric dipole moments (Au):

| state | X       | Y       | Z       | Dip. S. | Osc.   |
|-------|---------|---------|---------|---------|--------|
| 1     | 3.8246  | 0.0061  | 0.0008  | 14.6277 | 0.6837 |
| 2     | -3.1095 | 0.0685  | 0.0009  | 9.6739  | 0.6762 |
| 3     | -3.1168 | -0.3284 | -0.0079 | 9.8222  | 0.7674 |
| 4     | 0.0000  | -0.0000 | 0.0084  | 0.0001  | 0.0000 |
| 5     | -0.8589 | -0.0611 | -0.0059 | 0.7416  | 0.0633 |
| 6     | 0.2221  | -0.0175 | -0.0019 | 0.0496  | 0.0045 |
| 7     | 0.0001  | -0.0002 | 0.0111  | 0.0001  | 0.0000 |
| 8     | 0.0905  | -0.1514 | -0.0003 | 0.0311  | 0.0029 |
| 9     | 0.0077  | 0.0134  | -0.0001 | 0.0002  | 0.0000 |
| 10    | -0.0000 | 0.0002  | -0.0448 | 0.0020  | 0.0002 |
| 11    | 1.0201  | -0.5727 | -0.0046 | 1.3686  | 0.1373 |
| 12    | -0.5421 | -0.4678 | -0.0040 | 0.5127  | 0.0520 |
| 13    | -0.9117 | -0.9460 | 0.0037  | 1.7263  | 0.1779 |
| 14    | 0.2356  | -0.0407 | 0.0043  | 0.0572  | 0.0060 |
| 15    | 0.0002  | 0.0000  | 0.0149  | 0.0002  | 0.0000 |
| 16    | 0.3311  | 0.2348  | 0.0021  | 0.1647  | 0.0177 |
| 17    | 0.0638  | -0.2314 | 0.0018  | 0.0576  | 0.0063 |
| 18    | 0.4259  | 0.0379  | 0.0138  | 0.1830  | 0.0205 |
| 19    | -0.1467 | 0.3115  | -0.0029 | 0.1185  | 0.0140 |
| 20    | 0.2609  | 0.4353  | 0.0112  | 0.2577  | 0.0307 |
| 21    | -0.0000 | -0.0000 | 0.0115  | 0.0001  | 0.0000 |
| 22    | 0.0112  | -0.0984 | -0.0034 | 0.0098  | 0.0012 |
| 23    | 0.2321  | 0.2660  | 0.0037  | 0.1246  | 0.0153 |
| 24    | 0.4151  | 0.5762  | 0.0018  | 0.5044  | 0.0628 |
| 25    | -0.0001 | -0.0000 | 0.0308  | 0.0009  | 0.0001 |
| 26    | 0.3501  | 0.1603  | 0.0018  | 0.1483  | 0.0189 |
| 27    | -0.0001 | 0.0002  | -0.0204 | 0.0004  | 0.0001 |
| 28    | -0.0759 | -0.0891 | 0.0048  | 0.0137  | 0.0018 |
| 29    | -0.0000 | 0.0001  | -0.0101 | 0.0001  | 0.0000 |

|    |         |         |         |        |        |
|----|---------|---------|---------|--------|--------|
| 30 | 0.6091  | 0.1798  | 0.0065  | 0.4033 | 0.0527 |
| 31 | 0.3766  | -0.1863 | 0.1628  | 0.2030 | 0.0271 |
| 32 | 0.0010  | -0.4933 | -0.1686 | 0.2718 | 0.0364 |
| 33 | -0.1847 | -0.1904 | 0.3281  | 0.1780 | 0.0239 |
| 34 | 0.0014  | -0.5091 | -0.0117 | 0.2593 | 0.0351 |
| 35 | 0.0008  | -0.0039 | -0.0113 | 0.0001 | 0.0000 |
| 36 | -0.1515 | -0.3911 | -0.0002 | 0.1759 | 0.0240 |
| 37 | 0.2428  | 0.4470  | -0.0044 | 0.2588 | 0.0353 |
| 38 | -0.0002 | -0.0003 | -0.0263 | 0.0007 | 0.0001 |
| 39 | -0.0728 | -0.2669 | 0.0004  | 0.0765 | 0.0106 |
| 40 | -0.0001 | 0.0002  | -0.0692 | 0.0048 | 0.0007 |

Standard basis: TZVP (5D, 7F)

SCF Done:E(RPBE1PBE) = -1691.62704981 a.u.

**Table 11. BTN-3 Optimization of Ground State Geometry in Chloroform Solvent and Mulliken charges**

| Standard orientation: |        |        |             |             |           |
|-----------------------|--------|--------|-------------|-------------|-----------|
| Center                | Atomic | Atomic | Coordinates | (Angstroms) |           |
| Number                | Number | Type   | X           | Y           | Z         |
| 1                     | 6      | 0      | -6.826228   | -1.792691   | 0.001813  |
| 2                     | 6      | 0      | -7.528823   | -0.606668   | 0.001769  |
| 3                     | 6      | 0      | -6.809099   | 0.631810    | 0.001082  |
| 4                     | 6      | 0      | -5.352518   | 0.576162    | 0.000454  |
| 5                     | 6      | 0      | -4.642146   | -0.680208   | 0.000511  |
| 6                     | 6      | 0      | -5.416111   | -1.836424   | 0.001203  |
| 7                     | 7      | 0      | -7.288065   | 1.879327    | 0.000913  |
| 8                     | 16     | 0      | -5.984090   | 2.877956    | 0.000106  |
| 9                     | 7      | 0      | -4.768430   | 1.775080    | -0.000173 |
| 10                    | 6      | 0      | -0.599990   | -0.749746   | 0.003908  |
| 11                    | 6      | 0      | 0.122725    | -1.961388   | -0.001561 |
| 12                    | 6      | 0      | 1.508270    | -1.951586   | -0.002205 |
| 13                    | 6      | 0      | 2.244299    | -0.746155   | -0.002587 |
| 14                    | 6      | 0      | 1.509406    | 0.461860    | 0.002886  |
| 15                    | 6      | 0      | 0.125914    | 0.464024    | 0.008707  |
| 16                    | 6      | 0      | -2.015150   | -0.740578   | 0.004543  |
| 17                    | 6      | 0      | 3.700029    | -0.811689   | -0.003243 |
| 18                    | 6      | 0      | -3.234280   | -0.711415   | 0.005084  |
| 19                    | 6      | 0      | 4.559327    | 0.235235    | 0.001698  |
| 20                    | 6      | 0      | 6.013870    | 0.190490    | -0.009363 |
| 21                    | 6      | 0      | 6.742371    | 1.395687    | -0.014706 |
| 22                    | 6      | 0      | 8.128650    | 1.427789    | -0.030922 |
| 23                    | 6      | 0      | 8.881127    | 0.229255    | -0.057455 |
| 24                    | 6      | 0      | 8.154736    | -0.989295   | -0.031292 |
| 25                    | 6      | 0      | 6.770432    | -0.999522   | -0.015076 |
| 26                    | 7      | 0      | 10.260837   | 0.242889    | -0.110116 |
| 27                    | 6      | 0      | 11.003914   | -1.005373   | 0.076922  |
| 28                    | 6      | 0      | 10.975242   | 1.507658    | 0.072047  |
| 29                    | 7      | 0      | -8.988964   | -0.666970   | 0.002421  |
| 30                    | 8      | 0      | -9.610336   | 0.392477    | 0.002239  |
| 31                    | 8      | 0      | -9.511804   | -1.787062   | 0.003027  |
| 32                    | 1      | 0      | -7.395251   | -2.714501   | 0.002348  |
| 33                    | 1      | 0      | -4.920399   | -2.800959   | 0.001273  |
| 34                    | 1      | 0      | -0.418473   | -2.902605   | -0.006475 |
| 35                    | 1      | 0      | 2.047405    | -2.895790   | -0.007611 |
| 36                    | 1      | 0      | 2.032029    | 1.413265    | 0.007779  |
| 37                    | 1      | 0      | -0.420247   | 1.402246    | 0.008894  |

|    |   |   |           |           |           |
|----|---|---|-----------|-----------|-----------|
| 38 | 1 | 0 | 4.104908  | -1.822432 | -0.019125 |
| 39 | 1 | 0 | 4.146840  | 1.243650  | 0.012417  |
| 40 | 1 | 0 | 6.199442  | 2.338591  | 0.001289  |
| 41 | 1 | 0 | 8.628313  | 2.389081  | -0.025783 |
| 42 | 1 | 0 | 8.680424  | -1.936753 | -0.026453 |
| 43 | 1 | 0 | 6.265442  | -1.961333 | 0.000615  |
| 44 | 1 | 0 | 10.835931 | -1.472526 | 1.080474  |
| 45 | 1 | 0 | 10.731068 | -1.753542 | -0.697458 |
| 46 | 1 | 0 | 12.072748 | -0.786454 | -0.032839 |
| 47 | 1 | 0 | 10.682335 | 2.245530  | -0.707304 |
| 48 | 1 | 0 | 10.797698 | 1.974433  | 1.070534  |
| 49 | 1 | 0 | 12.048901 | 1.313798  | -0.043029 |

Mulliken charges:

|    |   |           |    |   |           |
|----|---|-----------|----|---|-----------|
| 1  | C | -0.202067 | 26 | N | -0.513617 |
| 2  | C | 0.288780  | 27 | C | -0.386916 |
| 3  | C | 0.221858  | 28 | C | -0.387078 |
| 4  | C | 0.243188  | 29 | N | 0.359572  |
| 5  | C | -0.001247 | 30 | O | -0.400317 |
| 6  | C | -0.187330 | 31 | O | -0.422065 |
| 7  | N | -0.560971 | 32 | H | 0.242945  |
| 8  | S | 0.646168  | 33 | H | 0.221700  |
| 9  | N | -0.584240 | 34 | H | 0.199552  |
| 10 | C | -0.026616 | 35 | H | 0.191056  |
| 11 | C | -0.160873 | 36 | H | 0.192636  |
| 12 | C | -0.238448 | 37 | H | 0.204237  |
| 13 | C | 0.137748  | 38 | H | 0.177679  |
| 14 | C | -0.224731 | 39 | H | 0.180336  |
| 15 | C | -0.156200 | 40 | H | 0.182075  |
| 16 | C | -0.062766 | 41 | H | 0.183934  |
| 17 | C | -0.239189 | 42 | H | 0.184295  |
| 18 | C | 0.022478  | 43 | H | 0.183285  |
| 19 | C | -0.211253 | 44 | H | 0.186770  |
| 20 | C | 0.112691  | 45 | H | 0.197528  |
| 21 | C | -0.241250 | 46 | H | 0.198867  |
| 22 | C | -0.240019 | 47 | H | 0.196872  |
| 23 | C | 0.367148  | 48 | H | 0.187754  |
| 24 | C | -0.238626 | 49 | H | 0.198588  |
| 25 | C | -0.223919 |    |   |           |

Standard basis: 6-31G(d) (6D, 7F)

SCF Done: E(RPBE1PBE) = -1691.23547732 a.u.

**Table 12. BTN-3 Calculation of excited state geometry in chloroform solvent**

Standard orientation:

| Center<br>Number | Atomic<br>Number | Atomic<br>Type | Coordinates (Angstroms) |           |          |
|------------------|------------------|----------------|-------------------------|-----------|----------|
|                  |                  |                | X                       | Y         | Z        |
| 1                | 6                | 0              | -6.826228               | -1.792691 | 0.001813 |
| 2                | 6                | 0              | -7.528823               | -0.606668 | 0.001769 |
| 3                | 6                | 0              | -6.809099               | 0.631810  | 0.001082 |

|    |    |   |           |           |           |
|----|----|---|-----------|-----------|-----------|
| 4  | 6  | 0 | -5.352518 | 0.576162  | 0.000454  |
| 5  | 6  | 0 | -4.642146 | -0.680208 | 0.000511  |
| 6  | 6  | 0 | -5.416111 | -1.836424 | 0.001203  |
| 7  | 7  | 0 | -7.288065 | 1.879327  | 0.000913  |
| 8  | 16 | 0 | -5.984090 | 2.877956  | 0.000106  |
| 9  | 7  | 0 | -4.768430 | 1.775080  | -0.000173 |
| 10 | 6  | 0 | -0.599990 | -0.749746 | 0.003908  |
| 11 | 6  | 0 | 0.122725  | -1.961388 | -0.001561 |
| 12 | 6  | 0 | 1.508270  | -1.951586 | -0.002205 |
| 13 | 6  | 0 | 2.244299  | -0.746155 | -0.002587 |
| 14 | 6  | 0 | 1.509406  | 0.461860  | 0.002886  |
| 15 | 6  | 0 | 0.125914  | 0.464024  | 0.008707  |
| 16 | 6  | 0 | -2.015150 | -0.740578 | 0.004543  |
| 17 | 6  | 0 | 3.700029  | -0.811689 | -0.003243 |
| 18 | 6  | 0 | -3.234280 | -0.711415 | 0.005084  |
| 19 | 6  | 0 | 4.559327  | 0.235235  | 0.001698  |
| 20 | 6  | 0 | 6.013870  | 0.190490  | -0.009363 |
| 21 | 6  | 0 | 6.742371  | 1.395687  | -0.014706 |
| 22 | 6  | 0 | 8.128650  | 1.427789  | -0.030922 |
| 23 | 6  | 0 | 8.881127  | 0.229255  | -0.057455 |
| 24 | 6  | 0 | 8.154736  | -0.989295 | -0.031292 |
| 25 | 6  | 0 | 6.770432  | -0.999522 | -0.015076 |
| 26 | 7  | 0 | 10.260837 | 0.242889  | -0.110116 |
| 27 | 6  | 0 | 11.003914 | -1.005373 | 0.076922  |
| 28 | 6  | 0 | 10.975242 | 1.507658  | 0.072047  |
| 29 | 7  | 0 | -8.988964 | -0.666970 | 0.002421  |
| 30 | 8  | 0 | -9.610336 | 0.392477  | 0.002239  |
| 31 | 8  | 0 | -9.511804 | -1.787062 | 0.003027  |
| 32 | 1  | 0 | -7.395251 | -2.714501 | 0.002348  |
| 33 | 1  | 0 | -4.920399 | -2.800959 | 0.001273  |
| 34 | 1  | 0 | -0.418473 | -2.902605 | -0.006475 |
| 35 | 1  | 0 | 2.047405  | -2.895790 | -0.007611 |
| 36 | 1  | 0 | 2.032029  | 1.413265  | 0.007779  |
| 37 | 1  | 0 | -0.420247 | 1.402246  | 0.008894  |
| 38 | 1  | 0 | 4.104908  | -1.822432 | -0.019125 |
| 39 | 1  | 0 | 4.146840  | 1.243650  | 0.012417  |
| 40 | 1  | 0 | 6.199442  | 2.338591  | 0.001289  |
| 41 | 1  | 0 | 8.628313  | 2.389081  | -0.025783 |
| 42 | 1  | 0 | 8.680424  | -1.936753 | -0.026453 |
| 43 | 1  | 0 | 6.265442  | -1.961333 | 0.000615  |
| 44 | 1  | 0 | 10.835931 | -1.472526 | 1.080474  |
| 45 | 1  | 0 | 10.731068 | -1.753542 | -0.697458 |
| 46 | 1  | 0 | 12.072748 | -0.786454 | -0.032839 |
| 47 | 1  | 0 | 10.682335 | 2.245530  | -0.707304 |
| 48 | 1  | 0 | 10.797698 | 1.974433  | 1.070534  |
| 49 | 1  | 0 | 12.048901 | 1.313798  | -0.043029 |

Ground to excited state transition electric dipole moments (Au):

| state | X       | Y       | Z       | Dip. S. | Osc.   |
|-------|---------|---------|---------|---------|--------|
| 1     | 4.4531  | 0.0338  | 0.0007  | 19.8312 | 0.8092 |
| 2     | -3.3776 | 0.0641  | 0.0017  | 11.4121 | 0.7491 |
| 3     | -2.9193 | -0.3998 | -0.0074 | 8.6821  | 0.6390 |
| 4     | 1.4281  | 0.1456  | 0.0071  | 2.0607  | 0.1604 |
| 5     | 0.5871  | -0.0099 | -0.0006 | 0.3448  | 0.0301 |
| 6     | -0.0001 | 0.0001  | -0.0072 | 0.0001  | 0.0000 |
| 7     | -0.0453 | 0.1441  | 0.0001  | 0.0228  | 0.0021 |

---

|    |         |         |         |        |        |
|----|---------|---------|---------|--------|--------|
| 8  | 0.0472  | -0.1287 | -0.0004 | 0.0188 | 0.0017 |
| 9  | 0.0000  | 0.0004  | 0.0060  | 0.0000 | 0.0000 |
| 10 | 0.6528  | -0.9736 | -0.0061 | 1.3740 | 0.1342 |
| 11 | 1.1711  | 0.6868  | 0.0001  | 1.8431 | 0.1814 |
| 12 | -0.0466 | -0.6821 | 0.0055  | 0.4674 | 0.0469 |
| 13 | 0.0000  | -0.0001 | 0.0486  | 0.0024 | 0.0002 |
| 14 | 0.0234  | -0.2770 | 0.0067  | 0.0773 | 0.0080 |
| 15 | -0.9457 | -0.5245 | 0.0021  | 1.1695 | 0.1217 |
| 16 | 0.0760  | -0.0897 | 0.0033  | 0.0138 | 0.0015 |
| 17 | 0.5208  | 0.1365  | 0.0130  | 0.2901 | 0.0315 |
| 18 | -0.0001 | -0.0001 | 0.0210  | 0.0004 | 0.0000 |
| 19 | -0.2927 | -0.4001 | -0.0094 | 0.2458 | 0.0285 |
| 20 | -0.2287 | -0.0492 | -0.0021 | 0.0547 | 0.0065 |
| 21 | -0.1663 | -0.4254 | -0.0033 | 0.2086 | 0.0254 |
| 22 | 0.2718  | 0.4980  | -0.0024 | 0.3218 | 0.0393 |
| 23 | -0.3081 | -0.4536 | 0.0020  | 0.3007 | 0.0370 |
| 24 | -0.1801 | 0.0944  | 0.0028  | 0.0414 | 0.0051 |
| 25 | -0.0000 | -0.0002 | 0.0349  | 0.0012 | 0.0002 |
| 26 | -0.0474 | 0.1141  | -0.0029 | 0.0153 | 0.0019 |
| 27 | 0.0000  | 0.0001  | -0.0094 | 0.0001 | 0.0000 |
| 28 | 0.4619  | -0.2827 | 0.0030  | 0.2933 | 0.0377 |
| 29 | -0.0009 | 0.0017  | 0.0186  | 0.0003 | 0.0000 |
| 30 | 0.0874  | 0.1519  | -0.0032 | 0.0307 | 0.0040 |
| 31 | 0.3153  | -0.5816 | 0.0221  | 0.4381 | 0.0569 |
| 32 | 0.2182  | 0.2882  | 0.0145  | 0.1309 | 0.0171 |
| 33 | 0.5936  | 0.7208  | 0.0233  | 0.8725 | 0.1144 |
| 34 | 0.0000  | 0.0001  | -0.0376 | 0.0014 | 0.0002 |
| 35 | 0.0000  | -0.0002 | 0.0000  | 0.0000 | 0.0000 |
| 36 | -0.0010 | -0.0098 | -0.0035 | 0.0001 | 0.0000 |
| 37 | 0.0929  | 0.7554  | -0.0030 | 0.5792 | 0.0790 |
| 38 | -0.1201 | -0.2483 | 0.0129  | 0.0762 | 0.0104 |
| 39 | -0.0034 | -0.0012 | 0.0049  | 0.0000 | 0.0000 |
| 40 | 0.1363  | 0.8996  | -0.0056 | 0.8280 | 0.1148 |

---

Standard basis: TZVP (5D, 7F)

SCF Done: E(RPBE1PBE) = -1691.64118186 a.u.
